# Supplementary material for: Genome-wide CRISPR screen identifies LGALS2 as an oxidative stress-responsive gene with an inhibitory function on colon tumor growth
Source: Oncogene. 2020 Oct 27;40(1):177–88. doi: 10.1038/s41388-020-01523-5 (PMC7790754; doi:10.1038/s41388-020-01523-5)
Supplement: Supplementary file 2 — Supplemental Table S1 [file 41388_2020_1523_MOESM2_ESM.xlsx]

## Sheet: CasTLE analysis
#GeneID	Symbol	Element #	casTLE Effect	casTLE Score	casTLE p-value
84132	USP42	3	-1.7	8.47	0.0001
253512	SLC25A30	2	5.8	8.76	0.0001
113622	ADPRHL1	2	7.1	9.03	0.0001
10251	SPRY3	4	-1.9	12.1	0.0001
54973	CPSF3L	1	7	7.88	0.0002
647219	ASCL5	2	7.1	7.68	0.0003
57369	GJD2	2	5.6	7.68	0.0003
53942	CNTN5	1	7	7.69	0.0003
84333	PCGF5	2	-2.2	7.39	0.0004
1819	DRG2	1	7	7.6	0.0004
118430	MUCL1	2	5.6	7.21	0.0004
114770	PGLYRP2	2	5.5	7.07	0.0004
257313	UTS2B	1	5.8	6.82	0.0005
5378	PMS1	1	5.9	6.82	0.0005
265	AMELX	1	5.9	6.84	0.0005
7757	ZNF208	1	5.9	6.8	0.0007
27250	PDCD4	2	5.4	6.74	0.001
7127	TNFAIP2	1	5.7	6.6	0.001
10475	TRIM38	1	5.7	6.67	0.001
254295	PHYHD1	3	5.8	6.65	0.001
25978	CHMP2B	2	4.2	6.26	0.001
128272	ARHGEF19	1	6.6	6.22	0.001
5074	PAWR	2	6.3	6.68	0.001
4495	MT1G	2	4.3	6.4	0.001
5985	RFC5	1	5.9	6.74	0.001
168391	GALNTL5	1	5.6	6.28	0.001
84759	PCGF1	1	6.1	6.44	0.001
84871	AGBL4	1	6.8	6.77	0.001
7327	UBE2G2	1	6.7	6.28	0.001
HSA-MIR-421	HSA-MIR-421	1	5.7	6.77	0.001
HSA-MIR-3927	HSA-MIR-3927	1	6.1	6.43	0.001
54852	PAQR5	2	4.4	6.39	0.001
283638	CEP170B	3	-1.5	6.67	0.001
83715	ESPN	1	5.7	6.53	0.001
59336	PRDM13	1	6.7	6.38	0.001
7694	ZNF135	1	5.6	6.24	0.001
4057	LTF	1	6	6.71	0.001
125150	ZSWIM7	2	-2.1	6.09	0.0011
30811	HUNK	1	5.6	6.21	0.0011
8227	AKAP17A	4	4.6	6.2	0.0011
389203	SMIM20	1	6.6	6.08	0.0011
8209	C21ORF33	1	6.2	6.21	0.0011
5744	PTHLH	1	5.5	6.03	0.0011
HSA-MIR-30B	HSA-MIR-30B	2	-1.8	6.13	0.0011
5243	ABCB1	2	5.4	6.19	0.0011
HSA-MIR-6717	HSA-MIR-6717	1	6.5	6.02	0.0012
394	ARHGAP5	1	6.3	6.01	0.0012
729830	FAM160A1	1	5.5	5.98	0.0013
347744	C6ORF52	1	6.4	5.96	0.0015
84191	FAM96A	1	5.5	5.85	0.0017
HSA-MIR-325	HSA-MIR-325	4	-1.7	5.86	0.0017
9470	EIF4E2	1	5.5	5.85	0.0017
219855	SLC37A2	2	-2	5.78	0.0019
57559	STAMBPL1	3	-2	5.76	0.0019
26278	SACS	3	4	5.71	0.0019
167153	PAPD4	1	5.4	5.5	0.0021
255231	MCOLN2	1	5.5	5.61	0.0021
9037	SEMA5A	2	5.2	5.61	0.0021
389874	ZCCHC13	2	5.7	5.57	0.0021
116254	GINM1	2	5.9	5.52	0.0021
7561	ZNF14	2	5.8	5.62	0.0021
3957	LGALS2	3	6.3	5.56	0.0021
57623	ZFAT	2	5.9	5.56	0.0021
26000	TBC1D10B	2	5.8	5.63	0.0021
5927	KDM5A	1	5.5	5.64	0.0021
KIAA1009	KIAA1009	2	4.7	5.52	0.0021
56832	IFNK	3	4.1	5.35	0.0022
124602	KIF19	2	5.2	5.28	0.0022
HSA-MIR-4297	HSA-MIR-4297	1	5.4	5.19	0.0022
10093	ARPC4	1	-2.6	5.45	0.0022
79657	RPAP3	2	5.7	5.41	0.0022
534	ATP6V1G2	1	-2.6	5.45	0.0022
438	ASMT	4	-1.9	5.27	0.0022
11073	TOPBP1	2	5.1	5.41	0.0022
64412	GZF1	1	-2.6	5.45	0.0022
26740	OR1J2	3	5.5	5.34	0.0022
HSA-MIR-4795	HSA-MIR-4795	2	-1.7	5.45	0.0022
HSA-MIR-4539	HSA-MIR-4539	1	5.4	5.17	0.0023
HSA-MIR-1911	HSA-MIR-1911	2	5.6	5.15	0.0025
85465	EPT1	2	6.2	4.94	0.0028
83941	TM2D1	1	5.3	5.05	0.0028
55314	TMEM144	2	4.6	5.05	0.0028
448834	KPRP	1	-2.5	4.92	0.0028
8440	NCK2	3	2.6	4.91	0.0029
641	BLM	3	3.2	4.87	0.0029
2162	F13A1	2	-2.2	4.9	0.0029
HSA-MIR-518C	HSA-MIR-518C	3	2.7	4.76	0.0032
HSA-MIR-8071-1	HSA-MIR-8071-1	2	4.8	4.76	0.0032
116843	SLC18B1	2	6.3	4.75	0.0032
HSA-MIR-6132	HSA-MIR-6132	3	3.2	4.68	0.0032
7681	MKRN3	1	5.3	4.76	0.0032
HSA-MIR-4684	HSA-MIR-4684	2	-1.6	4.78	0.0032
54658	UGT1A1	2	-1.8	4.78	0.0032
811	CALR	1	5.3	4.85	0.0032
4008	LMO7	2	-1.6	4.74	0.0032
HSA-MIR-8071-2	HSA-MIR-8071-2	2	4.8	4.76	0.0032
51313	FAM198B	2	5.5	4.68	0.0032
90737	PAGE5	2	6.3	4.73	0.0032
84624	FNDC1	3	3.5	4.65	0.0035
192111	PGAM5	1	-2.4	4.59	0.0035
56122	PCDHB14	2	5.5	4.59	0.0035
7164	TPD52L1	2	4.3	4.57	0.0035
100526693	ARPC4-TTLL3	2	-2.5	4.63	0.0035
55070	DET1	3	4	4.64	0.0035
653423	SPAG11A	2	4.7	4.56	0.0037
55344	PLCXD1	4	-1.7	4.55	0.0037
163227	ZNF100	2	5.5	4.5	0.0039
57715	SEMA4G	2	4.5	4.49	0.0039
64866	CDCP1	3	2.8	4.51	0.0039
6366	CCL21	1	5.2	4.47	0.0039
994	CDC25B	2	4.3	4.51	0.0039
57661	PHRF1	1	5.2	4.45	0.0039
54470	ARMCX6	1	5.2	4.52	0.0039
339448	C1ORF174	2	4.5	4.38	0.004
23283	CSTF2T	2	3.9	4.42	0.004
23179	RGL1	1	5.2	4.42	0.004
55081	IFT57	2	4.1	4.39	0.004
150365	MEI1	1	5.2	4.36	0.0041
326340	ZAR1	2	4.2	4.36	0.0041
3371	TNC	3	3	4.33	0.0042
HSA-MIR-6860	HSA-MIR-6860	1	-2.3	4.27	0.0042
HSA-MIR-1286	HSA-MIR-1286	4	3.8	4.32	0.0042
3563	IL3RA	6	-1.9	4.28	0.0042	0 : 30519	0 : 30516
9033	PKD2L1	2	4.3	4.35	0.0042
84239	ATP13A4	1	-2.3	4.27	0.0042
81168	OR8J3	3	6.1	4.31	0.0042
57758	SCUBE2	3	2.3	4.32	0.0042
80146	UXS1	2	-1.5	4.23	0.0043
728358	DEFA1B	2	-1.5	4.2	0.0043
4493	MT1E	2	-1.5	4.23	0.0043
HSA-MIR-8075	HSA-MIR-8075	4	-1.4	4.2	0.0043
1667	DEFA1	2	-1.5	4.2	0.0043
1668	DEFA3	2	-1.5	4.2	0.0043
6926	TBX3	3	5.1	4.21	0.0043
HSA-MIR-4676	HSA-MIR-4676	3	1.6	4.19	0.0044
HSA-MIR-668	HSA-MIR-668	3	-1.9	4.18	0.0046
3284	HSD3B2	2	4.6	4.17	0.0046
389362	PSMG4	1	5.1	4.18	0.0046
HSA-MIR-5009	HSA-MIR-5009	2	4.9	4.14	0.0046
5682	PSMA1	1	5.1	4.14	0.0046
84078	KBTBD7	2	-1.7	4.08	0.005
80835	TAS1R1	1	5.1	4.08	0.005
4200	ME2	3	-2.4	4.06	0.005
54657	UGT1A4	3	-1.7	4.08	0.005
54577	UGT1A7	3	-1.7	4.08	0.005
53635	PTOV1	1	5.1	4.11	0.005
54659	UGT1A3	3	-1.7	4.08	0.005
54576	UGT1A8	3	-1.7	4.08	0.005
HSA-MIR-516B-1	HSA-MIR-516B-1	4	-1.6	4.07	0.005
54579	UGT1A5	3	-1.7	4.08	0.005
727830	SPATA31A3	2	-1.7	4.08	0.005
54575	UGT1A10	3	-1.7	4.08	0.005
54578	UGT1A6	3	-1.7	4.08	0.005
254050	LRRC43	2	5.2	4.07	0.005
54600	UGT1A9	3	-1.7	4.08	0.005
4293	MAP3K9	2	5.4	4.01	0.0051
HSA-MIR-522	HSA-MIR-522	1	-2.2	4.04	0.0051
64100	ELSPBP1	2	4.6	4.03	0.0051
10274	STAG1	1	5.1	4.05	0.0051
50484	RRM2B	2	4	3.99	0.0052
26521	TIMM8B	1	5.1	4	0.0052
163049	ZNF791	3	-1.7	3.99	0.0052
6318	SERPINB4	2	-1.8	3.96	0.0056
6607	SMN2	1	-2.2	3.97	0.0056
55326	AGPAT5	1	5	3.95	0.0057
60386	SLC25A19	2	4.9	3.95	0.0057
55133	SRBD1	2	5	3.94	0.0057
54796	BNC2	1	5	3.91	0.0062
121642	ALKBH2	2	4.3	3.93	0.0062
26136	TES	2	-1.8	3.89	0.0063
54857	GDPD2	3	-1.9	3.89	0.0063
2307	FOXS1	1	5	3.9	0.0063
5326	PLAGL2	2	2.2	3.83	0.0065
28227	PPP2R3B	2	2	3.87	0.0065
HSA-MIR-4797	HSA-MIR-4797	2	2	3.85	0.0065
5562	PRKAA1	1	5	3.86	0.0065
56256	SERTAD4	1	5	3.78	0.0065
29780	PARVB	3	2.5	3.82	0.0065
8776	MTMR1	2	2.1	3.79	0.0065
55280	CWF19L1	2	3.8	3.81	0.0065
667	DST	2	-1.5	3.84	0.0065
22836	RHOBTB3	2	3.7	3.77	0.0067
55108	BSDC1	1	5	3.76	0.0068
7638	ZNF221	2	-1.4	3.76	0.0068
122618	PLD4	2	5.1	3.74	0.0069
8663	EIF3C	3	-2.4	3.73	0.0069
728689	EIF3CL	3	-2.4	3.73	0.0069
54981	NMRK1	2	4.1	3.67	0.007
6192	RPS4Y1	2	4.2	3.71	0.007
81689	ISCA1	1	5	3.72	0.007
392636	AGMO	2	5.3	3.69	0.007
HSA-MIR-6762	HSA-MIR-6762	2	2.3	3.72	0.007
HSA-MIR-4529	HSA-MIR-4529	3	6.3	3.67	0.007
8395	PIP5K1B	1	-2.1	3.67	0.007
23365	ARHGEF12	2	2.3	3.69	0.007
81502	HM13	1	4.9	3.69	0.007
4112	MAGEB1	1	4.9	3.7	0.007
80342	TRAF3IP3	1	4.9	3.71	0.007
79363	RSG1	2	2.3	3.69	0.007
284004	HEXDC	1	4.9	3.66	0.0074
HSA-MIR-19A	HSA-MIR-19A	2	2.1	3.66	0.0074
26090	ABHD12	3	5.5	3.65	0.0076
23172	FAM175B	3	-1.8	3.65	0.0076
HSA-MIR-320C-2	HSA-MIR-320C-2	1	4.9	3.65	0.0076
100287205	USP17L12	3	-1.3	3.59	0.008
291	SLC25A4	1	4.9	3.61	0.008
100287404	USP17L19	3	-1.3	3.59	0.008
3759	KCNJ2	1	4.9	3.62	0.008
1051	CEBPB	1	4.9	3.63	0.008
100287478	USP17L21	3	-1.3	3.59	0.008
3059	HCLS1	2	3.7	3.6	0.008
HSA-MIR-135A-1	HSA-MIR-135A-1	2	2.3	3.62	0.008
287	ANK2	3	-1.1	3.59	0.008
388335	TMEM220	2	4.1	3.63	0.008
643677	CCDC168	2	-1.7	3.56	0.0081
4302	MLLT6	2	-1.8	3.56	0.0081
CCDC41	CCDC41	1	4.9	3.56	0.0081
81543	LRRC3	2	3.6	3.56	0.0081
51517	NCKIPSD	2	3.6	3.54	0.0082
HSA-MIR-8073	HSA-MIR-8073	2	-1.3	3.55	0.0082
58	ACTA1	1	4.8	3.54	0.0082
29947	DNMT3L	2	5	3.53	0.0083
81470	OR2G2	1	4.8	3.53	0.0083
23192	ATG4B	3	4.7	3.5	0.0088
90529	STPG1	3	4.8	3.47	0.0088
79879	CCDC134	1	4.8	3.47	0.0088
4267	CD99	4	-1.5	3.47	0.0088
152330	CNTN4	1	-2.1	3.52	0.0088
256227	STEAP1B	1	4.8	3.52	0.0088
83595	SOX7	2	-1.9	3.5	0.0088
HSA-MIR-4800	HSA-MIR-4800	1	-2.1	3.52	0.0088
91272	BOD1	2	4.4	3.51	0.0088
HSA-MIR-3691	HSA-MIR-3691	2	4.4	3.51	0.0088
375035	SFT2D2	2	5.2	3.48	0.0088
PHF15	PHF15	2	4.6	3.47	0.0088
HSA-MIR-4768	HSA-MIR-4768	2	1.9	3.47	0.0088
386684	KRTAP12-4	1	4.8	3.47	0.0088
1233	CCR4	2	2	3.46	0.0093
9887	SMG7	2	2	3.45	0.0093
51465	UBE2J1	1	4.8	3.46	0.0093
57504	MTA3	2	5.2	3.46	0.0093
90649	ZNF486	3	4.3	3.44	0.0095
23102	TBC1D2B	2	3.5	3.43	0.0096
2646	GCKR	1	4.8	3.43	0.0096
11007	CCDC85B	2	3.6	3.43	0.0096
6799	SULT1A2	2	2.5	3.42	0.0096
23322	RPGRIP1L	1	4.7	3.41	0.0098
57624	NYAP2	1	4.7	3.41	0.0098
4928	NUP98	2	5.2	3.41	0.0098
2119	ETV5	1	4.7	3.4	0.0101
7037	TFRC	1	4.7	3.39	0.0102
9727	RAB11FIP3	1	4.7	3.39	0.0102
9076	CLDN1	1	-2	3.38	0.0106
147744	TMEM190	1	4.7	3.38	0.0106
89780	WNT3A	1	-2	3.38	0.0106
89790	SIGLEC10	1	-2	3.38	0.0106
57817	HAMP	1	-2	3.38	0.0106
129450	TYW5	2	-2.2	3.37	0.0115
51241	COX16	2	1.7	3.36	0.0115
119559	SFXN4	1	4.7	3.35	0.0115
166378	SPATA5	1	4.7	3.37	0.0115
6176	RPLP1	1	4.7	3.35	0.0115
27294	DHDH	1	4.7	3.34	0.012
28969	BZW2	1	4.6	3.33	0.0122
140576	S100A16	2	3.5	3.33	0.0122
51124	IER3IP1	1	4.6	3.33	0.0122
10344	CCL26	2	-1.3	3.32	0.0124
54014	BRWD1	2	1.6	3.32	0.0124
26230	TIAM2	1	4.6	3.31	0.0129
5460	POU5F1	2	2.2	3.31	0.0129
283373	ANKRD52	1	4.6	3.31	0.0129
439921	MXRA7	1	4.6	3.3	0.0131
23231	SEL1L3	2	3.4	3.3	0.0131
25939	SAMHD1	1	4.6	3.3	0.0131
HSA-MIR-519A-2	HSA-MIR-519A-2	2	-2.2	3.3	0.0131
51449	PCYOX1	2	4.9	3.3	0.0131
80223	RAB11FIP1	3	-1.3	3.3	0.0131
388325	SCIMP	2	1.9	3.3	0.0131
HSA-MIR-3915	HSA-MIR-3915	1	4.6	3.3	0.0131
HSA-MIR-4505	HSA-MIR-4505	2	2.6	3.3	0.0131
HSA-MIR-520B	HSA-MIR-520B	2	-2.2	3.3	0.0131
339976	TRIML1	1	4.6	3.3	0.0131
55148	UBR7	1	4.6	3.29	0.0132
10891	PPARGC1A	2	5.2	3.29	0.0132
51305	KCNK9	2	-2.2	3.29	0.0132
54899	PXK	2	1.8	3.28	0.0133
7047	TGM4	2	3.3	3.28	0.0133
HSA-MIR-6089-2	HSA-MIR-6089-2	2	2.6	3.27	0.0139
93627	TBCK	1	4.5	3.27	0.0139
26009	ZZZ3	2	3.5	3.27	0.0139
25782	RAB3GAP2	1	4.5	3.27	0.0139
HSA-MIR-6089-1	HSA-MIR-6089-1	2	2.6	3.27	0.0139
NIM1	NIM1	1	4.5	3.27	0.0139
9926	LPGAT1	1	4.6	3.27	0.0139
6777	STAT5B	2	5.2	3.27	0.0139
219970	GLYATL2	1	4.5	3.27	0.0139
3422	IDI1	1	4.5	3.26	0.0143
55004	LAMTOR1	2	1.6	3.26	0.0143
89941	RHOT2	1	4.5	3.26	0.0143
2002	ELK1	1	4.5	3.26	0.0143
147166	TRIM16L	2	-1.8	3.24	0.0146
100129669	IZUMO3	1	4.5	3.24	0.0146
55157	DARS2	1	4.5	3.24	0.0146
340307	CTAGE6	2	4.2	3.23	0.0148
6606	SMN1	2	-2.2	3.23	0.0148
96626	LIMS3	2	2	3.23	0.0148
54863	TOR4A	1	4.5	3.23	0.0148
100288695	LIMS3L	2	2	3.23	0.0148
11278	KLF12	2	3.3	3.22	0.0161
10360	NPM3	1	-1.9	3.22	0.0161
646498	C3ORF84	1	-1.9	3.22	0.0161
222484	LNX2	2	-2.2	3.22	0.0161
161424	NOP9	1	4.5	3.22	0.0161
LOC646498	LOC646498	1	-1.9	3.22	0.0161
130399	ACVR1C	1	-1.9	3.22	0.0161
HSA-MIR-3174	HSA-MIR-3174	1	-1.9	3.22	0.0161
57054	DAZ3	3	-2.3	3.21	0.0162
57055	DAZ2	3	-2.3	3.21	0.0162
HSA-MIR-548AY	HSA-MIR-548AY	1	4.4	3.21	0.0162
1617	DAZ1	3	-2.3	3.21	0.0162
57135	DAZ4	3	-2.3	3.21	0.0162
9498	SLC4A8	1	4.4	3.21	0.0162
8329	HIST1H2AI	1	4.4	3.21	0.0162
3630	INS	2	2.1	3.21	0.0162
81888	HYI	1	4.4	3.21	0.0162
64422	ATG3	1	4.4	3.2	0.017
9603	NFE2L3	1	4.4	3.2	0.017
6845	VAMP7	2	1.6	3.2	0.017
151473	SLC16A14	1	4.4	3.18	0.0176
51665	ASB1	3	2.3	3.18	0.0176
23225	NUP210	2	3.9	3.18	0.0176
29796	UQCR10	1	4.4	3.17	0.0177
9743	ARHGAP32	1	4.4	3.17	0.0177
284186	TMEM105	1	4.4	3.16	0.018
83417	FCRL4	1	4.4	3.16	0.018
26574	AATF	2	3.3	3.16	0.018
84894	LINGO1	1	4.4	3.16	0.018
643641	ZNF862	2	-1.7	3.16	0.018
51081	MRPS7	1	4.4	3.16	0.018
HSA-MIR-6821	HSA-MIR-6821	2	1.6	3.15	0.0198
7620	ZNF69	1	-1.9	3.15	0.0198
11249	NXPH2	1	-1.9	3.15	0.0198
29126	CD274	1	-1.9	3.15	0.0198
51000	SLC35B3	1	-1.9	3.15	0.0198
9724	UTP14C	1	-1.9	3.15	0.0198
2	A2M	1	4.3	3.15	0.0198
285343	TCAIM	1	4.3	3.15	0.0198
240	ALOX5	1	4.3	3.15	0.0198
284371	ZNF841	1	-1.9	3.14	0.02
374864	CCDC178	1	-1.9	3.14	0.02
HSA-MIR-4690	HSA-MIR-4690	1	4.3	3.14	0.02
HSA-MIR-4672	HSA-MIR-4672	1	4.3	3.13	0.0205
203238	CCDC171	3	-2	3.13	0.0205
124944	C17ORF49	1	4.3	3.13	0.0205
2832	NPBWR2	1	4.3	3.13	0.0205
286336	FAM78A	1	4.3	3.13	0.0205
150379	PNPLA5	1	4.3	3.13	0.0205
113655	MFSD3	2	5.1	3.13	0.0205
27253	PCDH17	2	3.4	3.12	0.0213
25796	PGLS	1	4.3	3.12	0.0213
64864	RFX7	2	-1.2	3.11	0.0214
3250	HPR	3	1.9	3.08	0.0216
126206	NLRP5	2	-2.1	3.1	0.0216
1470	CST2	2	2.8	3.1	0.0216
586	BCAT1	1	4.3	3.08	0.0216
3037	HAS2	2	1.9	3.09	0.0216
84902	CEP89	2	2	3.08	0.0216
HSA-MIR-3605	HSA-MIR-3605	2	2	3.1	0.0216
HSA-MIR-4752	HSA-MIR-4752	2	-2.1	3.1	0.0216
55374	TMCO6	2	2.8	3.09	0.0216
9468	PCYT1B	1	4.3	3.09	0.0216
4690	NCK1	1	4.3	3.09	0.0216
8701	DNAH11	1	4.3	3.1	0.0216
54033	RBM11	1	-1.9	3.09	0.0216
5940	RBMY1A1	3	2	3.1	0.0216
58511	DNASE2B	1	4.2	3.05	0.0231
23034	SAMD4A	2	2.7	3.06	0.0231
676	BRDT	1	-1.9	3.07	0.0231
23335	WDR7	2	2.9	3.07	0.0231
83538	TTC25	1	-1.9	3.07	0.0231
26022	TMEM98	1	4.2	3.05	0.0231
5051	PAFAH2	2	3	3.07	0.0231
55719	FAM178A	1	4.2	3.05	0.0231
56253	CRTAM	2	3.4	3.05	0.0231
84709	MGARP	1	-1.9	3.07	0.0231
5791	PTPRE	1	-1.9	3.07	0.0231
8464	SUPT3H	2	3.9	3.07	0.0231
133418	EMB	2	1.6	3.06	0.0231
23038	WDTC1	1	-1.9	3.07	0.0231
126374	WTIP	1	4.2	3.05	0.0231
8462	KLF11	3	2.9	3.07	0.0231
26267	FBXO10	2	3	3.06	0.0231
728712	SPANXA2	2	-1.9	3.05	0.0231
HSA-MIR-634	HSA-MIR-634	3	1.9	3.05	0.0231
22828	SCAF8	1	-1.9	3.07	0.0231
1346	COX7A1	2	-2.1	3.03	0.0232
27037	TRMT2A	2	3.9	3.04	0.0232
4671	NAIP	2	-1.5	3.04	0.0232
79155	TNIP2	3	4.1	3.04	0.0232
400120	SERTM1	2	3.4	3.04	0.0232
100130933	SMIM6	2	3	3.04	0.0232
387748	OR56B1	1	4.2	3.02	0.0234
152273	FGD5	1	4.2	3.02	0.0234
HSA-MIR-7702	HSA-MIR-7702	2	2.9	3.02	0.0234
1010	CDH12	1	4.2	3.01	0.024
286530	P2RY8	6	4.8	3.01	0.024	4.8 : 43220	4.8 : 43223
4693	NDP	2	4.1	3.01	0.024
HSA-MIR-548AN	HSA-MIR-548AN	1	4.2	3.01	0.024
7991	TUSC3	2	4.1	3.01	0.024
7399	USH2A	1	4.2	3.01	0.024
2771	GNAI2	1	4.2	3.01	0.024
158405	KIAA1958	1	4.2	3.01	0.024
HSA-MIR-3689E	HSA-MIR-3689E	3	-1.9	3.01	0.024
9293	GPR52	2	3.2	3.01	0.024
HSA-MIR-301B	HSA-MIR-301B	2	1.9	3.01	0.024
91828	EXOC3L4	2	2.8	3	0.0242
HSA-MIR-1226	HSA-MIR-1226	3	3.6	2.99	0.0242
343070	PRAMEF9	3	-1.6	2.98	0.0242
84658	EMR3	2	2.4	2.98	0.0242
10160	FARP1	2	5.1	3	0.0242
5436	POLR2G	2	3.4	2.99	0.0242
27293	SMPDL3B	1	4.2	2.98	0.0242
653619	PRAMEF15	3	-1.6	2.98	0.0242
157567	ANKRD46	2	3	2.99	0.0242
C14ORF166B	C14ORF166B	2	3.3	2.99	0.0242
HSA-MIR-4473	HSA-MIR-4473	1	4.2	2.99	0.0242
7637	ZNF84	1	4.2	2.97	0.0243
55083	KIF26B	1	4.2	2.97	0.0243
377630	USP17L2	2	1.5	2.97	0.0243
3903	LAIR1	1	4.2	2.97	0.0243
6776	STAT5A	2	4.2	2.94	0.0246
5995	RGR	1	-1.8	2.92	0.0246
55929	DMAP1	2	1.6	2.94	0.0246
728405	USP17L29	3	-1.3	2.94	0.0246
51335	NGRN	2	1.4	2.93	0.0246
7272	TTK	1	-1.8	2.92	0.0246
57493	HEG1	2	-1.2	2.95	0.0246
100287364	USP17L18	3	-1.3	2.94	0.0246
728379	USP17L26	3	-1.3	2.94	0.0246
5304	PIP	2	2.9	2.96	0.0246
HSA-MIR-1281	HSA-MIR-1281	1	4.1	2.92	0.0246
728419	USP17L30	3	-1.3	2.94	0.0246
728400	USP17L28	3	-1.3	2.94	0.0246
728373	USP17L25	3	-1.3	2.94	0.0246
100287513	USP17L22	3	-1.3	2.94	0.0246
57337	SENP7	3	1.8	2.92	0.0246
23639	LRRC6	2	-2.1	2.95	0.0246
100287441	USP17L20	3	-1.3	2.94	0.0246
728369	USP17L24	3	-1.3	2.94	0.0246
51122	COMMD2	1	4.1	2.92	0.0246
6742	SSBP1	2	-1.7	2.96	0.0246
112770	C1ORF85	1	-1.8	2.92	0.0246
114609	TIRAP	1	4.2	2.95	0.0246
HSA-MIR-4303	HSA-MIR-4303	1	4.2	2.95	0.0246
259292	TAS2R46	1	-1.8	2.92	0.0246
728393	USP17L27	3	-1.3	2.94	0.0246
100287327	USP17L17	3	-1.3	2.94	0.0246
100287178	USP17L11	3	-1.3	2.94	0.0246
537	ATP6AP1	2	2.9	2.93	0.0246
83593	RASSF5	2	3	2.93	0.0246
84707	BEX2	2	5.1	2.96	0.0246
4703	NEB	2	-2	2.93	0.0246
421	ARVCF	1	4.1	2.92	0.0246
6677	SPAM1	2	-1.9	2.91	0.0251
400569	MED11	2	1.5	2.89	0.0251
390078	OR52E6	3	1.6	2.9	0.0251
5447	POR	2	3	2.9	0.0251
55609	ZNF280C	1	4.1	2.9	0.0251
28960	DCPS	1	4.1	2.89	0.0251
HSA-MIR-150	HSA-MIR-150	1	4.1	2.89	0.0251
143570	XRRA1	1	4.1	2.89	0.0251
83698	CALN1	1	4.1	2.91	0.0251
57728	WDR19	1	4.1	2.88	0.0253
116832	RPL39L	1	4.1	2.88	0.0253
6423	SFRP2	2	2.6	2.88	0.0253
51805	COQ3	2	3	2.87	0.0254
7483	WNT9A	1	4.1	2.87	0.0254
23149	FCHO1	2	5	2.87	0.0254
10917	BTNL3	2	4.5	2.87	0.0254
HSA-MIR-6770-2	HSA-MIR-6770-2	2	-1.2	2.86	0.0256
51090	PLLP	1	4.1	2.86	0.0256
HSA-MIR-6770-1	HSA-MIR-6770-1	2	-1.2	2.86	0.0256
642987	TMEM232	2	5	2.85	0.0257
10250	SRRM1	1	-1.8	2.84	0.0276
283848	CES4A	1	-1.8	2.84	0.0276
83590	TMUB1	2	5	2.84	0.0276
10053	AP1M2	1	-1.8	2.84	0.0276
8527	DGKD	1	-1.8	2.84	0.0276
5352	PLOD2	1	-1.8	2.84	0.0276
26165	SPATA31A7	1	-1.8	2.84	0.0276
2173	FABP7	1	-1.8	2.84	0.0276
22996	TTC39A	1	-1.8	2.84	0.0276
1112	FOXN3	1	-1.8	2.84	0.0276
495	ATP4A	1	-1.8	2.84	0.0276
81567	TXNDC5	1	-1.8	2.84	0.0276
147660	ZNF578	1	-1.8	2.84	0.0276
5139	PDE3A	2	-1.9	2.84	0.0276
7920	ABHD16A	1	4.1	2.82	0.0278
1716	DGUOK	2	-2	2.83	0.0278
54916	TMEM260	2	-2	2.83	0.0278
127933	UHMK1	1	4.1	2.82	0.0278
9210	BMP15	2	5	2.82	0.0278
93663	ARHGAP18	3	2.3	2.83	0.0278
51510	CHMP5	2	-2	2.83	0.0278
286204	CRB2	1	4.1	2.82	0.0278
5064	PALM	2	3	2.83	0.0278
202	AIM1	1	4.1	2.81	0.0281
55930	MYO5C	1	4.1	2.81	0.0281
7555	CNBP	1	4.1	2.81	0.0281
SRCRB4D	SRCRB4D	3	2.7	2.8	0.0286
50808	AK3	2	-2	2.8	0.0286
140700	SAMD10	2	2.3	2.8	0.0286
219438	OR5D18	2	-1.8	2.8	0.0286
HSA-MIR-7111	HSA-MIR-7111	1	4	2.79	0.0291
60	ACTB	2	-2	2.79	0.0291
51092	SIDT2	1	4	2.79	0.0291
26534	OR10G2	2	-1.2	2.79	0.0291
HSA-MIR-509-3	HSA-MIR-509-3	3	-1.8	2.78	0.0294
100132403	FAM157B	1	4	2.76	0.0294
10767	HBS1L	3	4.4	2.76	0.0294
26039	SS18L1	1	-1.8	2.76	0.0294
643418	LIPN	1	-1.8	2.76	0.0294
5101	PCDH9	2	-2	2.76	0.0294
6230	RPS25	1	-1.8	2.76	0.0294
55071	C9ORF40	1	-1.8	2.76	0.0294
1816	DRD5	1	-1.8	2.76	0.0294
431705	ASTL	3	-1.9	2.77	0.0294
219749	ZNF25	1	-1.8	2.76	0.0294
23048	FNBP1	1	4	2.76	0.0294
HSA-MIR-299	HSA-MIR-299	2	2.7	2.76	0.0294
8802	SUCLG1	1	-1.8	2.76	0.0294
8863	PER3	1	-1.8	2.76	0.0294
5688	PSMA7	1	4	2.75	0.031
399979	SNX19	3	3.8	2.75	0.031
153218	SPINK13	3	1.6	2.75	0.031
22844	FRMPD1	2	1.5	2.73	0.0313
645864	MAGEB17	2	-1.1	2.72	0.0313
404552	SCGB1D4	1	4	2.74	0.0313
388969	C2ORF68	2	1.7	2.72	0.0313
HSA-MIR-3688-1	HSA-MIR-3688-1	2	3.3	2.73	0.0313
374897	SBSN	1	4	2.72	0.0313
HSA-MIR-3909	HSA-MIR-3909	3	2.4	2.72	0.0313
HSA-MIR-3688-2	HSA-MIR-3688-2	2	3.3	2.73	0.0313
171558	PTCRA	1	4	2.74	0.0313
91860	CALML4	1	4	2.74	0.0313
80005	DOCK5	2	-1.1	2.72	0.0313
3597	IL13RA1	2	5	2.74	0.0313
26526	TSPAN16	1	4	2.71	0.0314
150681	OR6B3	1	4	2.71	0.0314
54602	NDFIP2	2	4.2	2.71	0.0314
8336	HIST1H2AM	1	4	2.71	0.0314
5586	PKN2	1	4	2.71	0.0314
64129	TINAGL1	2	1.5	2.71	0.0314
57175	CORO1B	2	1.7	2.69	0.0326
HSA-MIR-4273	HSA-MIR-4273	2	-1.9	2.69	0.0326
390063	OR51I1	2	-1.9	2.69	0.0326
57727	NCOA5	3	2.4	2.7	0.0326
79753	SNIP1	1	-1.7	2.7	0.0326
8822	FGF17	1	4	2.69	0.0326
116362	RBP7	2	2.7	2.69	0.0326
2300	FOXL1	1	4	2.69	0.0326
132720	C4ORF32	2	-1.9	2.69	0.0326
54495	TMX3	2	-1.9	2.69	0.0326
54977	SLC25A38	1	4	2.7	0.0326
29103	DNAJC15	1	-1.7	2.7	0.0326
1780	DYNC1I1	2	4.2	2.68	0.0327
302	ANXA2	3	2.4	2.67	0.0328
79961	DENND2D	2	2.4	2.65	0.0329
64147	KIF9	1	4	2.66	0.0329
117283	IP6K3	2	-1.3	2.65	0.0329
79797	ZNF408	2	3.3	2.64	0.0329
8190	MIA	1	4	2.66	0.0329
374383	NCR3LG1	2	-1.3	2.65	0.0329
81671	VMP1	1	4	2.64	0.0329
90139	TSPAN18	2	-1.9	2.66	0.0329
23779	ARHGAP8	1	4	2.66	0.0329
4815	NINJ2	1	4	2.62	0.033
4597	MVD	1	4	2.62	0.033
HSA-MIR-1288	HSA-MIR-1288	2	1.5	2.63	0.033
23306	TMEM194A	2	4.9	2.63	0.033
6936	GCFC2	3	2.4	2.62	0.033
283130	SLC25A45	2	2.3	2.63	0.033
HSA-MIR-3177	HSA-MIR-3177	3	2.2	2.63	0.033
93034	NT5C1B	2	4.9	2.63	0.033
10935	PRDX3	1	3.9	2.61	0.0335
387332	TBPL2	3	2.4	2.61	0.0335
51560	RAB6B	2	4.6	2.61	0.0335
23243	ANKRD28	3	4	2.6	0.0336
HSA-MIR-4678	HSA-MIR-4678	2	-1.4	2.6	0.0336
10071	MUC12	2	-1.7	2.6	0.0336
168451	THAP5	2	1.4	2.6	0.0336
9452	ITM2A	1	3.9	2.6	0.0336
11081	KERA	2	-1.9	2.6	0.0336
3487	IGFBP4	1	3.9	2.6	0.0336
2908	NR3C1	2	-1.9	2.6	0.0336
4995	OR3A2	2	3.8	2.6	0.0336
HSA-MIR-151B	HSA-MIR-151B	1	3.9	2.6	0.0336
55646	LYAR	2	4.9	2.59	0.0353
8541	PPFIA3	1	-1.7	2.59	0.0353
10313	RTN3	1	-1.7	2.59	0.0353
7589	ZSCAN21	1	3.9	2.59	0.0353
6708	SPTA1	1	-1.7	2.59	0.0353
375759	C9ORF50	1	-1.7	2.59	0.0353
353219	KAAG1	1	-1.7	2.59	0.0353
10921	RNPS1	1	-1.7	2.59	0.0353
722	C4BPA	1	-1.7	2.59	0.0353
25771	TBC1D22A	1	-1.7	2.59	0.0353
257407	C2ORF72	1	-1.7	2.59	0.0353
79829	NAA40	1	-1.7	2.59	0.0353
22802	CLCA4	2	-1.2	2.58	0.0354
548596	CKMT1A	2	1.9	2.58	0.0354
10787	NCKAP1	1	3.9	2.58	0.0354
57097	PARP11	1	3.9	2.58	0.0354
390201	OR10V1	2	4.9	2.58	0.0354
3980	LIG3	2	-1.9	2.56	0.0356
5445	PON2	1	3.9	2.56	0.0356
56900	TMEM167B	1	3.9	2.56	0.0356
51065	RPS27L	2	-1.5	2.56	0.0356
10814	CPLX2	2	4.9	2.56	0.0356
80817	CEP44	1	3.9	2.56	0.0356
57205	ATP10D	2	4.9	2.56	0.0356
5298	PI4KB	2	3	2.55	0.0359
162681	C18ORF54	2	4.9	2.55	0.0359
64641	EBF2	1	3.9	2.55	0.0359
8648	NCOA1	1	3.9	2.54	0.0363
337959	KRTAP13-2	2	3.4	2.54	0.0363
80349	WDR61	1	3.9	2.54	0.0363
9960	USP3	3	1.7	2.53	0.0364
9348	NDST3	1	3.9	2.53	0.0364
221785	ZSCAN25	1	3.9	2.53	0.0364
391112	OR6Y1	1	3.9	2.53	0.0364
146547	PRSS36	3	-1.1	2.53	0.0364
2239	GPC4	2	1.9	2.53	0.0364
389177	TMEM212	2	-1.1	2.52	0.0365
65250	C5ORF42	1	-1.7	2.51	0.0365
285596	FAM153A	1	-1.7	2.51	0.0365
552	AVPR1A	1	-1.7	2.51	0.0365
6530	SLC6A2	1	-1.7	2.51	0.0365
765	CA6	2	1.5	2.51	0.0365
730249	IRG1	2	-1.1	2.52	0.0365
HSA-MIR-8064	HSA-MIR-8064	1	-1.7	2.51	0.0365
55716	LMBR1L	2	3.5	2.51	0.0365
2548	GAA	1	-1.7	2.51	0.0365
54812	AFTPH	1	3.9	2.52	0.0365
9502	XAGE2	2	2.8	2.52	0.0365
390064	OR51I2	2	2	2.49	0.0369
5544	PRB3	2	-1.4	2.49	0.0369
8436	SDPR	2	-1.9	2.49	0.0369
55629	PNRC2	2	3.4	2.5	0.0369
125206	SLC5A10	2	4.9	2.49	0.0369
9120	SLC16A6	2	-1.7	2.49	0.0369
2588	GALNS	2	3.5	2.5	0.0369
90288	EFCAB12	2	-1.9	2.49	0.0369
2020-09-06	2020-09-06	3	-1.2	2.5	0.0369
55850	USE1	2	1.4	2.48	0.0371
6448	SGSH	2	-1.9	2.48	0.0371
7703	PCGF2	2	1.7	2.48	0.0371
388407	C17ORF82	2	1.2	2.48	0.0371
2730	GCLM	2	4.4	2.48	0.0371
114987	WDR31	2	2.1	2.45	0.0376
481	ATP1B1	3	3.5	2.45	0.0376
8869	ST3GAL5	2	4.8	2.46	0.0376
26018	LRIG1	1	3.9	2.47	0.0376
60561	RINT1	2	4.9	2.47	0.0376
55243	KIRREL	1	3.9	2.47	0.0376
442862	PRY2	2	-1.1	2.47	0.0376
8813	DPM1	2	-1.1	2.47	0.0376
9969	MED13	2	-1.6	2.46	0.0376
7029	TFDP2	2	3	2.47	0.0376
84908	FAM136A	1	3.9	2.47	0.0376
200132	TCTEX1D1	3	2.4	2.47	0.0376
6599	SMARCC1	2	2.4	2.45	0.0376
129293	TRABD2A	1	-1.7	2.47	0.0376
64754	SMYD3	2	1.8	2.43	0.0379
2180	ACSL1	3	-1.2	2.43	0.0379
3066	HDAC2	2	-1.1	2.43	0.0379
114884	OSBPL10	2	-1.4	2.44	0.0379
HSA-MIR-3179-3	HSA-MIR-3179-3	3	1.5	2.44	0.0379
373863	DND1	3	1.4	2.43	0.0379
55711	FAR2	2	-1.7	2.44	0.0379
206412	C6ORF163	2	4.8	2.41	0.0393
22893	BAHD1	1	-1.6	2.42	0.0393
1234	CCR5	2	3.1	2.41	0.0393
653140	FAM228A	1	3.8	2.42	0.0393
11274	USP18	2	-1.6	2.41	0.0393
6295	SAG	1	-1.6	2.42	0.0393
4938	OAS1	1	-1.6	2.42	0.0393
115825	WDFY2	1	-1.6	2.42	0.0393
10626	TRIM16	2	-1.8	2.42	0.0393
79400	NOX5	2	-1.8	2.42	0.0393
115950	ZNF653	1	3.8	2.42	0.0393
120586	OR8I2	1	-1.6	2.42	0.0393
4317	MMP8	2	2.6	2.42	0.0393
10172	ZNF256	1	-1.6	2.42	0.0393
245939	DEFB128	2	2.7	2.42	0.0393
9943	OXSR1	1	-1.6	2.42	0.0393
1844	DUSP2	1	-1.6	2.42	0.0393
256536	TCERG1L	1	-1.6	2.42	0.0393
165545	DQX1	1	3.8	2.41	0.0393
10054	UBA2	1	-1.6	2.42	0.0393
7090	TLE3	3	2.7	2.37	0.0398
HSA-MIR-4279	HSA-MIR-4279	2	1.3	2.39	0.0398
649330	LOC649330	3	-0.9	2.37	0.0398
30014	SPANXA1	3	-1.8	2.4	0.0398
9465	AKAP7	1	3.8	2.4	0.0398
548593	SLX1A	2	3.2	2.37	0.0398
89832	CHRFAM7A	2	-1.1	2.39	0.0398
85317	BAGE4	2	-1.1	2.4	0.0398
222950	NYAP1	2	1.5	2.4	0.0398
8735	MYH13	3	2.2	2.38	0.0398
85316	BAGE5	2	-1.1	2.4	0.0398
100131755	ARMCX4	2	4.8	2.37	0.0398
230	ALDOC	2	4.8	2.38	0.0398
84749	USP30	3	1.9	2.4	0.0398
343069	HNRNPCL1	3	-0.9	2.37	0.0398
27347	STK39	1	-1.6	2.39	0.0398
HSA-MIR-203B	HSA-MIR-203B	3	1.4	2.37	0.0398
2949	GSTM5	2	-1.3	2.39	0.0398
2694	GIF	2	-1.3	2.37	0.0398
2014	EMP3	2	1.5	2.39	0.0398
11328	FKBP9	2	4	2.39	0.0398
54414	SIAE	1	3.8	2.38	0.0398
79008	SLX1B	2	3.2	2.37	0.0398
10728	PTGES3	2	1.2	2.4	0.0398
5433	POLR2D	1	3.8	2.36	0.0403
HSA-MIR-6715B	HSA-MIR-6715B	3	-2	2.36	0.0403
51112	TRAPPC12	2	3	2.36	0.0403
HSA-LET-7G	HSA-LET-7G	2	4.6	2.36	0.0403
23420	NOMO1	2	4.7	2.35	0.0403
727905	SPATA31A5	2	-1.7	2.36	0.0403
10541	ANP32B	1	3.8	2.36	0.0403
84883	AIFM2	2	1.2	2.35	0.0403
162514	TRPV3	2	4.6	2.34	0.0403
334	APLP2	1	3.8	2.36	0.0403
810	CALML3	2	4.7	2.34	0.0403
64061	TSPYL2	1	3.8	2.36	0.0403
10882	C1QL1	2	1.7	2.35	0.0403
HSA-MIR-431	HSA-MIR-431	3	-1.2	2.36	0.0403
HSA-MIR-6715A	HSA-MIR-6715A	3	-2	2.36	0.0403
132884	EVC2	2	1.2	2.36	0.0403
29098	RANGRF	1	-1.6	2.35	0.0403
2810	SFN	2	2.3	2.34	0.0403
399512	SLC25A35	1	-1.6	2.35	0.0403
6223	RPS19	1	3.8	2.36	0.0403
386672	KRTAP10-4	2	4.7	2.35	0.0403
146852	ODF4	2	4.7	2.35	0.0403
HSA-MIR-335	HSA-MIR-335	2	1.2	2.34	0.0403
64591	TSPY2	1	-1.6	2.35	0.0403
574537	UGT2A2	3	-1.8	2.32	0.0404
152015	ROPN1B	2	4.7	2.33	0.0404
55827	DCAF6	3	-1.5	2.33	0.0404
10941	UGT2A1	3	-1.8	2.32	0.0404
8310	ACOX3	2	4.5	2.33	0.0404
51186	WBP5	2	3.1	2.32	0.0404
1008	CDH10	2	4.7	2.32	0.0404
51592	TRIM33	2	4.7	2.33	0.0404
29999	FSCN3	2	-1	2.31	0.041
4047	LSS	2	-1	2.31	0.041
10768	AHCYL1	1	3.8	2.31	0.041
23023	TMCC1	2	4.6	2.3	0.041
2313	FLI1	2	4.6	2.31	0.041
7265	TTC1	2	2.5	2.3	0.041
5122	PCSK1	1	3.8	2.31	0.041
9445	ITM2B	3	3.1	2.31	0.041
88	ACTN2	1	3.8	2.3	0.041
389125	MUSTN1	2	4	2.29	0.041
1777	DNASE2	2	4.6	2.3	0.041
9156	EXO1	2	-1.2	2.31	0.041
7305	TYROBP	3	5.1	2.3	0.041
351	APP	2	4.7	2.31	0.041
57038	RARS2	1	3.8	2.29	0.041
HSA-MIR-4324	HSA-MIR-4324	1	3.8	2.3	0.041
7342	UBP1	2	1.4	2.31	0.041
10667	FARS2	2	2.3	2.3	0.041
348807	CCDC37	1	3.8	2.31	0.041
390321	OR6C1	2	3.8	2.28	0.0413
266740	MAGEA2B	2	-1.8	2.28	0.0413
151050	KANSL1L	2	4.7	2.28	0.0413
2953	GSTT2	1	3.8	2.27	0.0413
1101	CHAD	1	3.8	2.28	0.0413
3858	KRT10	2	2.6	2.27	0.0413
1490	CTGF	2	4.6	2.27	0.0413
HSA-MIR-5008	HSA-MIR-5008	1	3.8	2.28	0.0413
253943	YTHDF3	2	-1.8	2.28	0.0413
5887	RAD23B	1	3.8	2.28	0.0413
59272	ACE2	2	-1.8	2.26	0.0414
339230	CCDC137	1	3.8	2.26	0.0414
HSA-MIR-4661	HSA-MIR-4661	2	4.5	2.26	0.0414
23770	FKBP8	1	3.8	2.26	0.0414
254173	TTLL10	1	3.8	2.26	0.0414
8671	SLC4A4	2	4.6	2.26	0.0414
134218	DNAJC21	2	-1.3	2.26	0.0414
53405	CLIC5	2	4.6	2.26	0.0414
80013	FAM188A	1	-1.6	2.25	0.0416
140850	DEFB127	2	-1.7	2.25	0.0416
HSA-LET-7A-1	HSA-LET-7A-1	1	-1.6	2.25	0.0416
7110	TMF1	2	4.2	2.25	0.0416
6570	SLC18A1	1	-1.6	2.25	0.0416
1991	ELANE	1	-1.6	2.25	0.0416
47	ACLY	1	-1.6	2.25	0.0416
HSA-MIR-200C	HSA-MIR-200C	1	-1.6	2.25	0.0416
2996	GYPE	3	3.4	2.25	0.0416
353323	KRTAP12-2	1	-1.6	2.25	0.0416
2854	GPR32	1	-1.6	2.25	0.0416
79101	TAF1D	1	-1.6	2.25	0.0416
50807	ASAP1	1	-1.6	2.25	0.0416
5979	RET	1	-1.6	2.25	0.0416
29901	SAC3D1	1	3.8	2.25	0.0416
11212	PROSC	2	-1.7	2.25	0.0416
84954	MPND	1	-1.6	2.25	0.0416
HSA-MIR-3677	HSA-MIR-3677	2	2.5	2.24	0.0422
203	AK1	1	3.8	2.24	0.0422
4306	NR3C2	2	2.1	2.24	0.0422
54331	GNG2	2	1.9	2.24	0.0422
79184	BRCC3	1	3.8	2.24	0.0422
286187	PPP1R42	1	3.7	2.23	0.0425
3096	HIVEP1	2	4.6	2.23	0.0425
7251	TSG101	2	4.6	2.23	0.0425
24148	PRPF6	2	4.6	2.23	0.0425
730094	C16ORF52	2	2.9	2.22	0.0426
79501	OR4F5	2	4.5	2.22	0.0426
55684	RABL6	1	-1.6	2.22	0.0426
HSA-MIR-4330	HSA-MIR-4330	2	4.5	2.22	0.0426
135924	OR9A2	2	4.5	2.22	0.0426
27197	GPR82	1	3.7	2.22	0.0426
23286	WWC1	2	4.5	2.22	0.0426
339229	OXLD1	1	3.7	2.22	0.0426
55652	SLC48A1	2	-1.7	2.21	0.0428
81127	OR4K15	2	-1.7	2.21	0.0428
6822	SULT2A1	2	4.5	2.21	0.0428
11176	BAZ2A	1	3.7	2.21	0.0428
130026	ICA1L	3	3.2	2.21	0.0428
53838	C11ORF24	2	4.5	2.21	0.0428
27436	EML4	1	3.7	2.21	0.0428
55758	RCOR3	2	-1.7	2.21	0.0428
8805	TRIM24	2	-1.4	2.19	0.043
3767	KCNJ11	2	-1.6	2.2	0.043
100137049	PLA2G4B	3	-2	2.19	0.043
900	CCNG1	1	3.7	2.19	0.043
168455	CCDC71L	2	1.2	2.19	0.043
54971	BANP	1	3.7	2.19	0.043
51778	MYOZ2	2	-1.7	2.19	0.043
339883	C3ORF35	2	-1.7	2.19	0.043
84529	C15ORF41	3	-2	2.19	0.043
HSA-MIR-5680	HSA-MIR-5680	3	-1.1	2.19	0.043
116255	MOGAT1	2	-1.4	2.19	0.043
55616	ASAP3	2	1.2	2.2	0.043
56882	CDC42SE1	2	-1.5	2.16	0.0435
2020-09-10	2020-09-10	2	4.4	2.16	0.0435
389337	ARHGEF37	1	-1.5	2.16	0.0435
728137	TSPY3	3	-1.4	2.16	0.0435
10240	MRPS31	1	3.7	2.16	0.0435
8733	GPAA1	1	-1.5	2.16	0.0435
353149	TBC1D26	1	3.7	2.17	0.0435
26064	RAI14	2	4.4	2.18	0.0435
3949	LDLR	1	-1.5	2.16	0.0435
2107	ETF1	1	-1.5	2.16	0.0435
134957	STXBP5	2	4.4	2.16	0.0435
HSA-MIR-6871	HSA-MIR-6871	1	-1.5	2.16	0.0435
1910	EDNRB	1	-1.5	2.16	0.0435
HSA-MIR-3689A	HSA-MIR-3689A	3	4	2.18	0.0435
23650	TRIM29	2	4.4	2.18	0.0435
SMCR9	SMCR9	1	-1.5	2.16	0.0435
51300	TIMMDC1	2	4.4	2.16	0.0435
25803	SPDEF	2	4.5	2.18	0.0435
389383	CLPSL2	1	3.7	2.16	0.0435
63928	CHP2	1	-1.5	2.16	0.0435
26275	HIBCH	1	-1.5	2.16	0.0435
HSA-MIR-3944	HSA-MIR-3944	2	2	2.17	0.0435
867	CBL	1	-1.5	2.16	0.0435
1982	EIF4G2	2	4.4	2.16	0.0435
56943	ENY2	1	-1.5	2.16	0.0435
100506422	LOC100506422	2	-1.2	2.18	0.0435
6812	STXBP1	2	4.4	2.16	0.0435
HSA-MIR-153-1	HSA-MIR-153-1	1	-1.5	2.16	0.0435
619208	FAM229B	1	-1.5	2.16	0.0435
XAGE1C	XAGE1C	3	-1.6	2.18	0.0435
10321	CRISP3	2	-1.7	2.16	0.0435
XAGE1A	XAGE1A	3	-1.6	2.18	0.0435
9692	KIAA0391	1	-1.5	2.16	0.0435
653067	XAGE1E	3	-1.6	2.18	0.0435
5652	PRSS8	1	-1.5	2.16	0.0435
HSA-MIR-153-2	HSA-MIR-153-2	1	-1.5	2.16	0.0435
284086	NEK8	2	1.2	2.16	0.0435
255758	TCTEX1D2	1	-1.5	2.16	0.0435
XAGE1D	XAGE1D	3	-1.6	2.18	0.0435
653220	XAGE1B	3	-1.6	2.18	0.0435
116179	TGM7	2	-1.1	2.15	0.0466
22899	ARHGEF15	2	4.4	2.15	0.0466
9704	DHX34	1	3.7	2.15	0.0466
9406	ZRANB2	2	4.4	2.15	0.0466
79602	ADIPOR2	2	4.4	2.15	0.0466
140699	MROH8	2	-1.7	2.14	0.0472
23291	FBXW11	1	3.7	2.14	0.0472
81448	OR6K2	2	-1.7	2.14	0.0472
23657	SLC7A11	1	3.7	2.14	0.0472
89853	MVB12B	1	3.7	2.14	0.0472
54039	PCBP3	2	4.4	2.14	0.0472
10020	GNE	2	-1.7	2.14	0.0472
613	BCR	1	3.7	2.14	0.0472
29946	SERTAD3	2	3.5	2.13	0.0473
26254	OPTC	2	4.4	2.13	0.0473
286122	C8ORF31	2	-1.7	2.13	0.0473
1504	CTRB1	3	1.2	2.13	0.0473
55008	HERC6	2	4.4	2.13	0.0473
2766	GMPR	2	1.1	2.13	0.0473
4313	MMP2	3	2.8	2.13	0.0473
9673	SLC25A44	1	3.7	2.13	0.0473
344752	AADACL2	2	-1.3	2.13	0.0473
645191	LINGO3	2	4.3	2.12	0.0476
11055	ZPBP	3	2.7	2.12	0.0476
166348	KBTBD12	2	-1.4	2.12	0.0476
HSA-MIR-548AE-1	HSA-MIR-548AE-1	2	4.3	2.12	0.0476
80145	THOC7	2	-1.4	2.12	0.0476
55062	WIPI1	2	-1.4	2.12	0.0476
11158	RABL2B	2	1.1	2.11	0.0479
9214	FAIM3	2	2.6	2.11	0.0479
151887	CCDC80	2	4.3	2.11	0.0479
146542	ZNF688	2	4.3	2.11	0.0479
23024	PDZRN3	2	4.3	2.11	0.0479
9772	KIAA0195	1	3.7	2.11	0.0479
91522	COL23A1	1	3.7	2.11	0.0479
HSA-MIR-1264	HSA-MIR-1264	1	3.7	2.11	0.0479
23011	RAB21	1	3.7	2.1	0.0482
4848	CNOT2	3	2.2	2.1	0.0482
29887	SNX10	2	4.3	2.1	0.0482
2840	GPR17	2	4.3	2.1	0.0482
167691	LCA5	2	3	2.1	0.0482
HSA-MIR-1203	HSA-MIR-1203	3	2.1	2.1	0.0482
400746	NCMAP	2	4.3	2.1	0.0482
201232	SLC16A13	2	4.2	2.1	0.0482
HSA-MIR-586	HSA-MIR-586	2	-1	2.1	0.0482
204851	HIPK1	2	-1	2.1	0.0482
HSA-MIR-8070	HSA-MIR-8070	3	1.3	2.09	0.0483
644054	FAM25C	2	-1.6	2.09	0.0483
3443	IFNA6	2	2.2	2.09	0.0483
100133093	FAM25G	2	-1.6	2.09	0.0483
154075	SAMD3	2	-1	2.09	0.0483
7051	TGM1	1	-1.5	2.09	0.0483
114904	C1QTNF6	2	4.3	2.09	0.0483
23753	SDF2L1	2	4.3	2.09	0.0483
9760	TOX	3	2.2	2.09	0.0483
4850	CNOT4	2	1.7	2.09	0.0483
7009	TMBIM6	1	3.7	2.08	0.0488
680	BRS3	1	-1.5	2.08	0.0488
100272147	CMC4	1	3.7	2.08	0.0488
51629	SLC25A39	1	3.7	2.08	0.0488
7073	TIAL1	1	3.7	2.08	0.0488
85360	SYDE1	1	3.7	2.08	0.0488
8800	PEX11A	1	-1.5	2.07	0.049
132864	CPEB2	1	-1.5	2.07	0.049
55268	ECHDC2	1	-1.5	2.07	0.049
3695	ITGB7	1	-1.5	2.07	0.049
79035	NABP2	1	-1.5	2.07	0.049
9827	RGP1	1	-1.5	2.07	0.049
90410	IFT20	1	-1.5	2.07	0.049
386617	KCTD8	1	3.7	2.07	0.049
56947	MFF	1	-1.5	2.07	0.049
140683	BPIFA2	1	-1.5	2.07	0.049
8019	BRD3	1	-1.5	2.07	0.049
51207	DUSP13	2	2.6	2.07	0.049
22925	PLA2R1	1	-1.5	2.07	0.049
HSA-MIR-511	HSA-MIR-511	6	-1.2	2.07	0.049	1.56 : 26676	1.56 : 26677
793	CALB1	1	-1.5	2.07	0.049
LOC147646	LOC147646	1	-1.5	2.07	0.049
248	ALPI	2	-1	2.07	0.049
79626	TNFAIP8L2	1	-1.5	2.07	0.049
346562	GNAT3	1	-1.5	2.07	0.049
56896	DPYSL5	1	-1.5	2.07	0.049
130355	C2ORF76	1	-1.5	2.07	0.049
55777	MBD5	1	-1.5	2.07	0.049
5931	RBBP7	1	-1.5	2.07	0.049
2132	EXT2	1	-1.5	2.07	0.049
HSA-MIR-569	HSA-MIR-569	2	4.2	2.05	0.0516
94056	SYAP1	2	4.2	2.05	0.0516
HSA-MIR-3689C	HSA-MIR-3689C	3	1.2	2.05	0.0516
55159	RFWD3	2	-1.2	2.05	0.0516
219956	OR9Q1	1	3.6	2.04	0.0519
51473	DCDC2	2	-1.6	2.04	0.0519
8260	NAA10	2	-1.6	2.04	0.0519
5621	PRNP	2	1	2.03	0.0522
130951	M1AP	2	1.5	2.03	0.0522
613211	DEFB134	1	3.6	2.03	0.0522
HSA-MIR-302B	HSA-MIR-302B	2	3.3	2.03	0.0522
6349	CCL3L1	3	3.1	2.02	0.0527
1495	CTNNA1	2	-1.6	2.02	0.0527
9189	ZBED1	4	2.4	2.02	0.0527
56987	BBX	1	3.6	2.02	0.0527
414062	CCL3L3	3	3.1	2.02	0.0527
81034	SLC25A32	3	1.2	2.02	0.0527
145788	C15ORF65	1	3.6	2.01	0.0542
7357	UGCG	1	3.6	2.01	0.0542
HSA-LET-7F-1	HSA-LET-7F-1	3	1.3	2.01	0.0542
29085	PHPT1	1	3.6	2.01	0.0542
9081	PRY	3	-1	2.01	0.0542
HSA-MIR-646	HSA-MIR-646	1	3.6	2.01	0.0542
FLJ27352	FLJ27352	1	3.6	2.01	0.0542
150678	MYEOV2	2	4.2	2.01	0.0542
HSA-MIR-1272	HSA-MIR-1272	2	1.9	2.01	0.0542
56136	PCDHA13	3	1.2	2.01	0.0542
6165	RPL35A	1	3.6	2	0.0543
10092	ARPC5	1	3.6	2	0.0543
HSA-MIR-5091	HSA-MIR-5091	2	4.2	2	0.0543
27000	DNAJC2	3	2.8	2	0.0543
8814	CDKL1	2	4.2	2	0.0543
1407	CRY1	3	2.8	2	0.0543
8611	PPAP2A	2	-1	2	0.0543
9245	GCNT3	2	-1.6	1.99	0.0544
220136	CCDC11	2	-1.6	1.99	0.0544
HSA-MIR-214	HSA-MIR-214	2	-1.6	1.99	0.0544
2956	MSH6	2	-1.6	1.99	0.0544
6820	SULT2B1	2	-1.6	1.99	0.0544
100506564	THEGL	2	-1.6	1.98	0.0544
8030	CCDC6	2	-1	1.99	0.0544
HSA-MIR-7976	HSA-MIR-7976	1	3.6	1.97	0.0544
200150	PLD5	1	3.6	1.97	0.0544
5618	PRLR	2	2.7	1.98	0.0544
56914	OTOR	2	3.4	1.99	0.0544
HSA-MIR-3120	HSA-MIR-3120	2	-1.6	1.99	0.0544
4148	MATN3	2	-1.6	1.99	0.0544
57572	DOCK6	1	3.6	1.97	0.0544
29118	DDX25	2	3	1.99	0.0544
54843	SYTL2	3	3.7	1.97	0.0544
83990	BRIP1	2	-1.6	1.99	0.0544
1434	CSE1L	2	-1.6	1.98	0.0544
38	ACAT1	2	4.2	1.99	0.0544
390882	OR7G2	1	3.6	1.97	0.0544
10147	SUGP2	1	3.6	1.97	0.0544
493856	CISD2	1	3.6	1.97	0.0544
8741	TNFSF13	2	2.3	1.98	0.0544
157807	CLVS1	3	-1	1.98	0.0544
116840	CNTROB	1	3.6	1.98	0.0544
55615	PRR5	3	3.1	1.99	0.0544
150223	YDJC	3	4	1.96	0.055
HSA-MIR-5095	HSA-MIR-5095	1	3.6	1.96	0.055
284459	HKR1	2	4.1	1.96	0.055
22914	KLRK1	3	1.3	1.96	0.055
6491	STIL	2	1.7	1.94	0.0552
10519	CIB1	2	1.1	1.95	0.0552
23562	CLDN14	1	3.6	1.94	0.0552
152185	SPICE1	3	3.3	1.95	0.0552
114805	GALNT13	3	1.3	1.95	0.0552
84449	ZNF333	2	2.3	1.94	0.0552
57602	USP36	2	1	1.95	0.0552
728568	C12ORF73	1	3.6	1.94	0.0552
64321	SOX17	2	4.1	1.95	0.0552
126433	FBXO27	1	3.6	1.94	0.0552
441608	OR5B3	2	-1.6	1.92	0.0557
5443	POMC	1	3.6	1.91	0.0557
3218	HOXB8	1	3.6	1.91	0.0557
150709	ANKAR	2	-1.6	1.92	0.0557
HSA-MIR-1200	HSA-MIR-1200	2	4.1	1.93	0.0557
84958	SYTL1	1	3.6	1.91	0.0557
HSA-MIR-5701-2	HSA-MIR-5701-2	3	1.7	1.91	0.0557
1975	EIF4B	2	-1.6	1.91	0.0557
159091	FAM122C	2	-1.6	1.91	0.0557
23317	DNAJC13	1	3.6	1.92	0.0557
55610	CCDC132	2	-1.6	1.92	0.0557
79544	OR4K1	1	3.6	1.91	0.0557
HSA-MIR-5701-1	HSA-MIR-5701-1	3	1.7	1.91	0.0557
6198	RPS6KB1	1	3.6	1.91	0.0557
10402	ST3GAL6	2	2.6	1.93	0.0557
HSA-MIR-577	HSA-MIR-577	1	3.6	1.91	0.0557
6002	RGS12	1	-1.4	1.89	0.0563
54456	MOV10L1	2	4.1	1.89	0.0563
219771	CCNY	1	3.6	1.9	0.0563
HSA-MIR-1224	HSA-MIR-1224	3	1.1	1.88	0.0563
57480	PLEKHG1	1	-1.4	1.89	0.0563
7084	TK2	1	3.6	1.89	0.0563
85366	MYLK2	1	-1.4	1.89	0.0563
3265	HRAS	2	3.7	1.88	0.0563
911	CD1C	3	3.4	1.89	0.0563
100506388	LOC100506388	1	-1.4	1.89	0.0563
23627	PRND	1	-1.4	1.89	0.0563
11016	ATF7	1	-1.4	1.89	0.0563
64078	SLC28A3	1	-1.4	1.89	0.0563
9715	FAM131B	1	-1.4	1.89	0.0563
149628	PYHIN1	1	-1.4	1.89	0.0563
55275	VPS53	1	-1.4	1.88	0.0563
3320	HSP90AA1	1	-1.4	1.89	0.0563
HSA-MIR-509-2	HSA-MIR-509-2	3	-1.8	1.88	0.0563
127579	DCST2	2	-1.1	1.89	0.0563
6688	SPI1	2	1	1.89	0.0563
4515	MTCP1	1	-1.4	1.89	0.0563
7016	TESK1	1	-1.4	1.89	0.0563
50813	COPS7A	1	-1.4	1.89	0.0563
10773	ZBTB6	1	-1.4	1.89	0.0563
7106	TSPAN4	3	-1.1	1.89	0.0563
HSA-MIR-509-1	HSA-MIR-509-1	3	-1.8	1.88	0.0563
1956	EGFR	2	4.1	1.88	0.0563
3664	IRF6	1	-1.4	1.89	0.0563
389207	GRXCR1	1	-1.4	1.89	0.0563
257101	ZNF683	3	-1	1.88	0.0563
57001	ACN9	3	1.6	1.9	0.0563
284306	ZNF547	1	-1.4	1.89	0.0563
HSA-MIR-6738	HSA-MIR-6738	1	-1.4	1.89	0.0563
490	ATP2B1	1	3.6	1.89	0.0563
9984	THOC1	1	-1.4	1.89	0.0563
7267	TTC3	2	-1.6	1.89	0.0563
125113	KRT222	2	-1.6	1.89	0.0563
115584	SLC5A11	3	-1.1	1.88	0.0563
5116	PCNT	2	-1.5	1.89	0.0563
8878	SQSTM1	1	-1.4	1.89	0.0563
8808	IL1RL2	1	3.5	1.87	0.0567
HSA-MIR-6505	HSA-MIR-6505	1	3.5	1.87	0.0567
HSA-MIR-1271	HSA-MIR-1271	2	2.8	1.87	0.0567
728695	SPANXB1	3	-1.8	1.87	0.0567
51574	LARP7	1	3.5	1.87	0.0567
55334	SLC39A9	2	1.6	1.87	0.0567
160287	LDHAL6A	2	-1.5	1.87	0.0567
SPANXB2	SPANXB2	3	-1.8	1.87	0.0567
8575	PRKRA	2	3.6	1.87	0.0567
29941	PKN3	1	3.5	1.86	0.0571
283600	SLC25A47	3	1.8	1.86	0.0571
10753	CAPN9	1	3.5	1.86	0.0571
83591	THAP2	2	3.2	1.86	0.0571
5160	PDHA1	1	3.5	1.86	0.0571
154313	C6ORF165	2	4.1	1.86	0.0571
657	BMPR1A	2	-1.4	1.86	0.0571
51540	SCLY	1	3.5	1.86	0.0571
100507290	ZNF865	1	2.1	1.85	0.0572
SLC24A6	SLC24A6	1	2.1	1.85	0.0572
ADC	ADC	1	2.1	1.85	0.0572
8303	SNN	1	2.1	1.85	0.0572
364	AQP7	1	2.1	1.85	0.0572
HSA-MIR-548BA	HSA-MIR-548BA	1	2.1	1.85	0.0572
5045	FURIN	1	2.1	1.85	0.0572
8456	FOXN1	1	2.1	1.85	0.0572
7319	UBE2A	1	2.1	1.85	0.0572
144245	ALG10B	1	2.1	1.85	0.0572
10424	PGRMC2	1	2.1	1.85	0.0572
342346	C16ORF96	1	2	1.85	0.0572
3482	IGF2R	1	2.1	1.85	0.0572
85413	SLC22A16	2	-1	1.85	0.0572
85459	KIAA1731	1	2.1	1.85	0.0572
5553	PRG2	1	2.1	1.85	0.0572
57468	SLC12A5	1	2.1	1.85	0.0572
8986	RPS6KA4	1	2	1.85	0.0572
26996	GPR160	3	2.4	1.85	0.0572
HSA-MIR-3064	HSA-MIR-3064	1	2.1	1.85	0.0572
23194	FBXL7	2	2.8	1.85	0.0572
83608	C18ORF21	1	2.1	1.85	0.0572
79734	KCTD17	1	2.1	1.85	0.0572
65988	ZNF747	1	2.1	1.85	0.0572
5800	PTPRO	1	2.1	1.85	0.0572
2892	GRIA3	1	2.1	1.85	0.0572
54101	RIPK4	1	2.1	1.85	0.0572
730005	SEC14L6	1	2.1	1.85	0.0572
163255	ZNF540	1	2	1.85	0.0572
10214	SSX3	1	2.1	1.85	0.0572
4897	NRCAM	1	3.5	1.85	0.0572
HSA-MIR-32	HSA-MIR-32	1	2.1	1.85	0.0572
GPER	GPER	1	2.1	1.85	0.0572
147945	NLRP4	2	2.8	1.85	0.0572
55754	TMEM30A	1	2.1	1.85	0.0572
285590	SH3PXD2B	1	2.1	1.85	0.0572
112755	STX1B	1	2.1	1.85	0.0572
79777	ACBD4	1	2.1	1.85	0.0572
646486	FABP12	1	2.1	1.85	0.0572
171484	FAM9C	1	2.1	1.85	0.0572
343263	MYBPHL	1	2.1	1.85	0.0572
10016	PDCD6	1	2.1	1.85	0.0572
55340	GIMAP5	2	-1	1.85	0.0572
HSA-MIR-6514	HSA-MIR-6514	1	2.1	1.85	0.0572
390066	OR52D1	1	2.1	1.85	0.0572
284129	SLC26A11	1	2.1	1.85	0.0572
1295	COL8A1	1	2.1	1.85	0.0572
HSA-MIR-6796	HSA-MIR-6796	1	2.1	1.85	0.0572
HSA-MIR-620	HSA-MIR-620	1	2.1	1.85	0.0572
79776	ZFHX4	1	2.1	1.85	0.0572
839	CASP6	1	2.1	1.85	0.0572
652	BMP4	1	3.5	1.84	0.0623
339906	PRSS42	1	2.1	1.84	0.0623
54535	CCHCR1	3	3.9	1.84	0.0623
144124	OR10A5	1	2.1	1.84	0.0623
100130539	LOC100130539	1	2.1	1.84	0.0623
HSA-MIR-4528	HSA-MIR-4528	1	2.1	1.84	0.0623
547	KIF1A	2	-1.3	1.84	0.0623
57124	CD248	3	1.3	1.84	0.0623
57706	DENND1A	2	-1.6	1.84	0.0623
4644	MYO5A	2	-1.6	1.84	0.0623
403257	OR4C45	1	3.5	1.84	0.0623
2926	GRSF1	1	2.1	1.84	0.0623
5896	RAG1	2	-0.9	1.84	0.0623
91752	ZNF804A	1	2	1.84	0.0623
387733	IFITM5	1	3.5	1.84	0.0623
11340	EXOSC8	1	2.1	1.84	0.0623
HSA-MIR-6788	HSA-MIR-6788	1	2.1	1.84	0.0623
2621	GAS6	1	2.1	1.84	0.0623
100170229	SRRM5	1	2.1	1.84	0.0623
84944	MAEL	2	-1.6	1.84	0.0623
6285	S100B	1	2.1	1.84	0.0623
26751	SH3YL1	1	2.1	1.84	0.0623
57663	USP29	1	3.5	1.84	0.0623
645369	TMEM200C	1	2	1.84	0.0623
2328	FMO3	1	2	1.84	0.0623
284018	C17ORF58	1	2.1	1.84	0.0623
56903	PAPOLB	1	2.1	1.84	0.0623
HSA-MIR-1587	HSA-MIR-1587	1	2.1	1.84	0.0623
51222	ZNF219	1	2.1	1.84	0.0623
57464	STRIP2	1	2.1	1.84	0.0623
6713	SQLE	1	2.1	1.84	0.0623
85438	CABS1	3	-1	1.84	0.0623
100885848	PTGES3L	1	3.5	1.84	0.0623
83998	REG4	1	2.1	1.84	0.0623
8940	TOP3B	1	2	1.84	0.0623
116511	MAS1L	1	2.1	1.84	0.0623
HSA-MIR-5004	HSA-MIR-5004	1	2.1	1.84	0.0623
1281	COL3A1	1	2.1	1.84	0.0623
2674	GFRA1	2	-0.9	1.84	0.0623
1389	CREBL2	2	4.1	1.84	0.0623
5075	PAX1	1	2.1	1.84	0.0623
9388	LIPG	1	3.5	1.84	0.0623
51660	MPC1	1	2	1.84	0.0623
100885850	PTGES3L-AARSD1	1	3.5	1.84	0.0623
7075	TIE1	1	2.1	1.84	0.0623
10574	CCT7	1	3.5	1.84	0.0623
126248	WDR88	1	2.1	1.84	0.0623
124540	MSI2	1	2	1.84	0.0623
7866	IFRD2	1	2.1	1.84	0.0623
6875	TAF4B	1	2	1.84	0.0623
66005	CHID1	1	2.1	1.84	0.0623
22977	AKR7A3	2	-1.6	1.84	0.0623
54442	KCTD5	1	2.1	1.84	0.0623
56979	PRDM9	1	2.1	1.84	0.0623
255239	ANKK1	1	2	1.84	0.0623
441452	SPATA31C1	2	-1.6	1.84	0.0623
79733	E2F8	2	-1.3	1.84	0.0623
121504	HIST4H4	1	2	1.84	0.0623
1088	CEACAM8	2	-1.6	1.84	0.0623
440	ASNS	1	2.1	1.84	0.0623
25854	FAM149A	1	2.1	1.84	0.0623
115111	SLC26A7	2	-1.6	1.84	0.0623
53349	ZFYVE1	1	2.2	1.83	0.0671
24147	FJX1	1	2.2	1.83	0.0671
26272	FBXO4	1	2	1.83	0.0671
90113	VWA5B2	1	2	1.83	0.0671
441911	OR10J3	1	2.1	1.83	0.0671
147372	CCBE1	1	2.2	1.83	0.0671
258	AMBN	1	2	1.83	0.0671
3718	JAK3	1	2	1.83	0.0671
8544	PIR	1	2	1.83	0.0671
670	BPHL	1	2.1	1.83	0.0671
57546	PDP2	1	2	1.83	0.0671
494188	FBXO47	1	2	1.83	0.0671
58487	CREBZF	2	2.1	1.83	0.0671
3176	HNMT	1	2.2	1.83	0.0671
79004	CUEDC2	1	2	1.83	0.0671
2116	ETV2	1	2.2	1.83	0.0671
28990	ASTE1	1	2	1.83	0.0671
1650	DDOST	1	2.2	1.83	0.0671
9683	N4BP1	1	2.2	1.83	0.0671
51477	ISYNA1	1	2	1.83	0.0671
22931	RAB18	2	1.4	1.83	0.0671
3622	ING2	1	2	1.83	0.0671
146760	RTN4RL1	1	2.2	1.83	0.0671
7299	TYR	3	1.1	1.83	0.0671
161	AP2A2	1	2.2	1.83	0.0671
HSA-MIR-429	HSA-MIR-429	1	2	1.83	0.0671
10954	PDIA5	1	2.2	1.83	0.0671
6484	ST3GAL4	1	2.2	1.83	0.0671
81035	COLEC12	1	2.2	1.83	0.0671
23028	KDM1A	1	2.2	1.83	0.0671
6687	SPG7	1	2.2	1.83	0.0671
1746	DLX2	1	2.2	1.83	0.0671
51278	IER5	1	2	1.83	0.0671
56133	PCDHB2	1	2	1.83	0.0671
23228	PLCL2	1	2.2	1.83	0.0671
51246	SHISA5	1	2	1.83	0.0671
123207	C15ORF40	1	2.2	1.83	0.0671
79971	WLS	1	2	1.83	0.0671
957	ENTPD5	1	2.1	1.83	0.0671
254778	C8ORF46	1	2.2	1.83	0.0671
64332	NFKBIZ	1	2.2	1.83	0.0671
246100	CTAG1A	1	2.2	1.83	0.0671
401399	PRRT4	1	2.2	1.83	0.0671
3299	HSF4	1	2.2	1.83	0.0671
1478	CSTF2	1	2	1.83	0.0671
9001	HAP1	1	2.2	1.83	0.0671
9991	PTBP3	1	2	1.83	0.0671
80210	ARMC9	1	2	1.83	0.0671
390999	PRAMEF12	1	2.2	1.83	0.0671
27285	TEKT2	1	2.2	1.83	0.0671
64714	PDIA2	1	2.2	1.83	0.0671
125488	TTC39C	1	2.2	1.83	0.0671
54811	ZNF562	1	2.2	1.83	0.0671
347853	TBX10	1	2	1.83	0.0671
1181	CLCN2	1	2.2	1.83	0.0671
2564	GABRE	1	2	1.83	0.0671
160364	CLEC12A	1	2.2	1.83	0.0671
51447	IP6K2	1	2	1.83	0.0671
80333	KCNIP4	1	2	1.83	0.0671
5671	PSG3	1	2.2	1.83	0.0671
85289	KRTAP4-5	1	2	1.83	0.0671
11193	WBP4	1	2.2	1.83	0.0671
3001	GZMA	2	-1.6	1.83	0.0671
23111	SPG20	1	2.1	1.83	0.0671
282966	C10ORF53	1	2	1.83	0.0671
400673	VMAC	1	2	1.83	0.0671
4283	CXCL9	1	2.2	1.82	0.0701
51094	ADIPOR1	1	2.2	1.82	0.0701
HSA-MIR-6844	HSA-MIR-6844	1	2	1.82	0.0701
22909	FAN1	1	2.2	1.82	0.0701
5617	PRL	1	2.2	1.82	0.0701
140883	ZNF280B	1	1.9	1.82	0.0701
126969	SLC44A3	1	1.9	1.82	0.0701
11320	MGAT4A	1	2.2	1.82	0.0701
55714	TENM3	1	1.9	1.82	0.0701
9568	GABBR2	1	1.9	1.82	0.0701
80704	SLC19A3	1	1.9	1.82	0.0701
54869	EPS8L1	1	1.9	1.82	0.0701
337969	KRTAP19-2	1	1.9	1.82	0.0701
386677	KRTAP10-1	1	2.2	1.82	0.0701
644	BLVRA	1	2.2	1.82	0.0701
130733	TMEM178A	1	2.2	1.82	0.0701
HSA-MIR-4438	HSA-MIR-4438	1	1.9	1.82	0.0701
1580	CYP4B1	1	2	1.82	0.0701
287015	TRIM42	1	1.9	1.82	0.0701
51334	PRR16	1	2.2	1.82	0.0701
51053	GMNN	1	1.9	1.82	0.0701
60314	C12ORF10	1	2.2	1.82	0.0701
5921	RASA1	1	1.9	1.82	0.0701
136259	KLF14	1	2.2	1.82	0.0701
10062	NR1H3	1	2.2	1.82	0.0701
HSA-MIR-329-1	HSA-MIR-329-1	1	2.2	1.82	0.0701
3208	HPCA	1	1.9	1.82	0.0701
23509	POFUT1	1	1.9	1.82	0.0701
8905	AP1S2	1	2.2	1.82	0.0701
146050	ZSCAN29	1	2.2	1.82	0.0701
8491	MAP4K3	1	2.2	1.82	0.0701
50836	TAS2R8	1	2.2	1.82	0.0701
7292	TNFSF4	1	2.2	1.82	0.0701
80034	CSRNP3	1	2.2	1.82	0.0701
56929	FEM1C	1	2.2	1.82	0.0701
27297	CRCP	1	2.2	1.82	0.0701
HSA-MIR-5684	HSA-MIR-5684	1	2.2	1.82	0.0701
54619	CCNJ	1	1.9	1.82	0.0701
HSA-MIR-3606	HSA-MIR-3606	1	1.9	1.82	0.0701
6635	SNRPE	1	1.9	1.82	0.0701
80352	RNF39	1	2.2	1.82	0.0701
254863	TMEM256	1	2	1.82	0.0701
2131	EXT1	1	2	1.82	0.0701
120400	NXPE1	1	1.9	1.82	0.0701
10319	LAMC3	1	2.2	1.82	0.0701
8677	STX10	1	1.9	1.82	0.0701
7332	UBE2L3	1	2.2	1.82	0.0701
5890	RAD51B	1	2.2	1.82	0.0701
HSA-MIR-448	HSA-MIR-448	1	1.9	1.82	0.0701
400818	NBPF9	1	1.9	1.82	0.0701
8702	B4GALT4	1	1.9	1.82	0.0701
58491	ZNF71	1	2.2	1.82	0.0701
1308	COL17A1	1	2.2	1.82	0.0701
153527	ZMAT2	1	1.9	1.82	0.0701
26074	C20ORF26	1	2.2	1.82	0.0701
22978	NT5C2	1	2.2	1.82	0.0701
8828	NRP2	1	2.2	1.82	0.0701
84515	MCM8	1	1.9	1.81	0.0745
93492	TPTE2	1	1.9	1.81	0.0745
729233	PRR20B	2	4	1.81	0.0745
8447	DOC2B	1	1.9	1.81	0.0745
51526	OSER1	2	-1.1	1.81	0.0745
503582	ARGFX	1	2.2	1.81	0.0745
729240	PRR20C	2	4	1.81	0.0745
729250	PRR20E	2	4	1.81	0.0745
90861	HN1L	1	2.2	1.81	0.0745
7325	UBE2E2	1	2.2	1.81	0.0745
729246	PRR20D	2	4	1.81	0.0745
HSA-MIR-18A	HSA-MIR-18A	1	1.9	1.81	0.0745
80347	COASY	1	1.9	1.81	0.0745
5683	PSMA2	1	1.9	1.81	0.0745
83943	IMMP2L	1	1.9	1.81	0.0745
4642	MYO1D	1	2.2	1.81	0.0745
64065	PERP	1	1.9	1.81	0.0745
131096	KCNH8	1	1.9	1.81	0.0745
57619	SHROOM3	2	2.3	1.81	0.0745
122183	PRR20A	2	4	1.81	0.0745
2902	GRIN1	3	2.5	1.81	0.0745
55607	PPP1R9A	1	-1.4	1.81	0.0745
344387	CDKL4	1	1.9	1.81	0.0745
84103	C4ORF17	2	3.2	1.81	0.0745
415117	STX19	1	1.9	1.8	0.0752
5509	PPP1R3D	1	1.9	1.8	0.0752
57608	KIAA1462	1	1.9	1.8	0.0752
3592	IL12A	1	3.5	1.8	0.0752
64762	GAREM	2	-1.2	1.8	0.0752
79785	RERGL	2	4	1.8	0.0752
728403	TSPY8	3	-1.5	1.8	0.0752
63935	PCIF1	1	1.9	1.8	0.0752
9832	JAKMIP2	1	3.5	1.8	0.0752
57721	METTL14	1	3.5	1.8	0.0752
51333	ZNF771	1	3.5	1.8	0.0752
9537	TP53I11	1	3.5	1.8	0.0752
HSA-MIR-4687	HSA-MIR-4687	2	-0.9	1.8	0.0752
388324	INCA1	1	-1.4	1.79	0.0782
5700	PSMC1	1	-1.4	1.79	0.0782
9295	SRSF11	1	-1.4	1.79	0.0782
5997	RGS2	1	2.2	1.79	0.0782
4832	NME3	1	-1.4	1.79	0.0782
10243	GPHN	1	-1.4	1.79	0.0782
HSA-MIR-548I-2	HSA-MIR-548I-2	1	-1.4	1.79	0.0782
5245	PHB	1	2.2	1.79	0.0782
246184	CDC26	1	1.9	1.79	0.0782
4439	MSH5	1	-1.4	1.79	0.0782
10388	SYCP2	1	1.9	1.79	0.0782
349565	NMNAT3	1	-1.4	1.79	0.0782
10232	MSLN	1	2.2	1.79	0.0782
3850	KRT3	2	2.1	1.79	0.0782
10929	SRSF8	1	1.9	1.79	0.0782
HSA-MIR-6501	HSA-MIR-6501	1	1.9	1.79	0.0782
117289	TAGAP	1	2.2	1.79	0.0782
9058	SLC13A2	1	3.5	1.79	0.0782
89766	UMODL1	1	-1.4	1.79	0.0782
51200	CPA4	1	1.9	1.79	0.0782
285242	HTR3E	1	-1.4	1.79	0.0782
148304	C1ORF74	1	-1.4	1.79	0.0782
5017	OVOL1	1	-1.4	1.79	0.0782
10149	GPR64	1	-1.4	1.79	0.0782
54951	COMMD8	1	-1.4	1.79	0.0782
257397	TAB3	1	2.2	1.79	0.0782
27349	MCAT	1	1.9	1.79	0.0782
HSA-MIR-548I-1	HSA-MIR-548I-1	1	-1.4	1.79	0.0782
HSA-MIR-204	HSA-MIR-204	1	1.9	1.79	0.0782
HSA-MIR-3618	HSA-MIR-3618	1	1.9	1.79	0.0782
LOC100288524	LOC100288524	1	1.9	1.79	0.0782
151525	WDSUB1	1	2.2	1.79	0.0782
125115	KRT40	1	-1.4	1.79	0.0782
9203	ZMYM3	1	2.2	1.79	0.0782
7092	TLL1	1	-1.4	1.79	0.0782
2624	GATA2	1	1.9	1.79	0.0782
389376	SFTA2	1	-1.4	1.79	0.0782
5217	PFN2	1	-1.4	1.79	0.0782
159195	USP54	1	2.2	1.79	0.0782
390154	OR5T3	1	2.2	1.79	0.0782
HSA-MIR-548I-3	HSA-MIR-548I-3	1	-1.4	1.79	0.0782
162655	ZNF519	1	2.2	1.79	0.0782
51393	TRPV2	1	2.2	1.79	0.0782
3013	HIST1H2AD	1	-1.4	1.79	0.0782
6744	SSFA2	1	-1.4	1.79	0.0782
79366	HMGN5	1	1.9	1.79	0.0782
2158	F9	1	-1.4	1.79	0.0782
HSA-MIR-3179-1	HSA-MIR-3179-1	2	0.9	1.79	0.0782
PHF17	PHF17	1	2.2	1.79	0.0782
535	ATP6V0A1	1	3.5	1.79	0.0782
26260	FBXO25	1	-1.4	1.79	0.0782
10127	ZNF263	1	1.9	1.79	0.0782
8208	CHAF1B	1	-1.4	1.79	0.0782
HSA-MIR-1229	HSA-MIR-1229	1	-1.4	1.79	0.0782
9175	MAP3K13	1	1.9	1.79	0.0782
10047	CST8	1	2.3	1.79	0.0782
29760	BLNK	1	2.2	1.79	0.0782
119687	OR51A7	1	-1.4	1.79	0.0782
83452	RAB33B	1	-1.4	1.79	0.0782
53828	FXYD4	1	2.2	1.79	0.0782
51663	ZFR	1	1.9	1.79	0.0782
55655	NLRP2	1	1.9	1.79	0.0782
113402	SFT2D1	1	-1.4	1.79	0.0782
221322	TBC1D32	3	2.4	1.79	0.0782
HSA-MIR-3179-2	HSA-MIR-3179-2	2	0.9	1.79	0.0782
57474	ZNF490	1	1.9	1.79	0.0782
90693	CCDC126	1	1.9	1.79	0.0782
23224	SYNE2	1	2.2	1.79	0.0782
10865	ARID5A	1	1.9	1.79	0.0782
54065	SMIM11	2	1.8	1.79	0.0782
55339	WDR33	1	2.2	1.79	0.0782
8975	USP13	1	-1.4	1.79	0.0782
23184	MESDC2	1	1.9	1.79	0.0782
153769	SH3RF2	1	1.9	1.79	0.0782
57544	TXNDC16	2	1.8	1.79	0.0782
5130	PCYT1A	1	3.5	1.79	0.0782
140460	ASB7	1	2.2	1.79	0.0782
11057	ABHD2	1	2.3	1.79	0.0782
HSA-MIR-4774	HSA-MIR-4774	1	2.2	1.79	0.0782
64766	S100PBP	1	1.9	1.79	0.0782
80055	PGAP1	1	-1.4	1.79	0.0782
400581	GRAPL	1	1.9	1.79	0.0782
28973	MRPS18B	1	1.9	1.79	0.0782
C6ORF170	C6ORF170	3	2.4	1.79	0.0782
92737	DNER	1	1.9	1.79	0.0782
128360	OR10T2	1	1.9	1.79	0.0782
2944	GSTM1	1	-1.4	1.79	0.0782
9665	KIAA0430	1	-1.4	1.79	0.0782
64432	MRPS25	1	1.9	1.79	0.0782
5603	MAPK13	1	-1.4	1.79	0.0782
HSA-MIR-410	HSA-MIR-410	1	-1.4	1.79	0.0782
HSA-MIR-133B	HSA-MIR-133B	1	2.2	1.79	0.0782
400	ARL1	1	2.3	1.78	0.0791
1139	CHRNA7	1	1.9	1.78	0.0791
27074	LAMP3	3	-1.6	1.78	0.0791
164312	LRRN4	1	2.3	1.78	0.0791
26256	CABYR	1	1.9	1.78	0.0791
100507608	KRTAP9-6	2	1.4	1.77	0.0808
728395	TSPY4	2	-1.5	1.77	0.0808
113277	TMEM106A	1	1.8	1.77	0.0808
131566	DCBLD2	1	1.9	1.77	0.0808
C12ORF68	C12ORF68	1	2.3	1.77	0.0808
4277	MICB	1	1.8	1.77	0.0808
23362	PSD3	1	3.5	1.77	0.0808
340359	KLHL38	2	4	1.77	0.0808
225689	MAPK15	2	4	1.77	0.0808
5787	PTPRB	2	1.9	1.77	0.0808
23198	PSME4	1	1.8	1.77	0.0808
7258	TSPY1	2	-1.5	1.77	0.0808
375248	ANKRD36	1	2.3	1.77	0.0808
8100	IFT88	1	1.8	1.77	0.0808
6725	SRMS	3	-1.2	1.77	0.0808
10407	SPAG11B	1	1.9	1.77	0.0808
3439	IFNA1	1	1.8	1.76	0.0829
10404	CPQ	1	1.8	1.76	0.0829
389792	IER5L	1	1.8	1.76	0.0829
283598	C14ORF177	1	2.3	1.76	0.0829
2824	GPM6B	1	2.3	1.76	0.0829
6259	RYK	1	2.3	1.76	0.0829
84872	ZC3H10	2	1.7	1.76	0.0829
8795	TNFRSF10B	1	1.8	1.76	0.0829
11137	PWP1	2	-1.3	1.76	0.0829
254272	TBC1D28	1	1.8	1.76	0.0829
143458	LDLRAD3	1	1.8	1.76	0.0829
3881	KRT31	1	2.3	1.76	0.0829
79908	BTNL8	1	2.3	1.76	0.0829
55713	ZNF334	2	-1.3	1.76	0.0829
6017	RLBP1	1	1.8	1.76	0.0829
339665	SLC35E4	1	2.3	1.76	0.0829
HSA-MIR-548AV	HSA-MIR-548AV	1	1.8	1.76	0.0829
4297	KMT2A	1	2.3	1.76	0.0829
129303	TMEM150A	2	4	1.76	0.0829
1759	DNM1	1	2.3	1.76	0.0829
390595	UBAP1L	1	2.3	1.76	0.0829
HSA-MIR-4639	HSA-MIR-4639	3	-1.3	1.76	0.0829
636	BICD1	1	2.3	1.76	0.0829
3447	IFNA13	1	1.8	1.76	0.0829
2315	MLANA	1	2.3	1.76	0.0829
3730	KAL1	1	2.3	1.76	0.0829
79295	OR5H6	1	1.8	1.76	0.0829
HSA-MIR-135A-2	HSA-MIR-135A-2	1	2.3	1.76	0.0829
3882	KRT32	2	-0.9	1.75	0.0862
170063	CXORF22	1	1.8	1.75	0.0862
100129842	ZNF737	1	1.8	1.75	0.0862
84971	ATG4D	1	1.8	1.75	0.0862
64651	CSRNP1	1	2.3	1.75	0.0862
9140	ATG12	1	3.5	1.75	0.0862
840	CASP7	1	1.8	1.75	0.0862
7464	CORO2A	1	1.8	1.75	0.0862
RBAK-LOC389458	RBAK-LOC389458	2	0.9	1.74	0.0875
55657	ZNF692	1	1.8	1.74	0.0875
25849	PARM1	1	2.3	1.74	0.0875
7697	ZNF138	1	1.8	1.74	0.0875
10492	SYNCRIP	1	2.3	1.74	0.0875
202243	CCDC125	1	1.8	1.74	0.0875
HSA-MIR-548H-3	HSA-MIR-548H-3	2	4	1.74	0.0875
64114	TMBIM1	1	1.8	1.74	0.0875
6091	ROBO1	2	-1.5	1.74	0.0875
64407	RGS18	1	1.8	1.74	0.0875
9847	C2CD5	1	3.5	1.74	0.0875
130612	TMEM198	1	1.8	1.74	0.0875
HSA-MIR-412	HSA-MIR-412	3	1.8	1.74	0.0875
54622	ARL15	2	-1.5	1.74	0.0875
1999	ELF3	1	2.3	1.74	0.0875
91624	NEXN	1	1.8	1.74	0.0875
221091	LRRN4CL	1	1.8	1.74	0.0875
9590	AKAP12	1	1.8	1.74	0.0875
80205	CHD9	1	3.5	1.74	0.0875
477	ATP1A2	1	3.5	1.74	0.0875
120796	OR56A1	1	3.5	1.74	0.0875
121268	RHEBL1	1	1.8	1.74	0.0875
386681	KRTAP10-8	2	2.4	1.74	0.0875
79473	OR52N1	1	1.8	1.74	0.0875
149466	C1ORF210	1	1.8	1.73	0.0881
22936	ELL2	1	1.8	1.73	0.0881
10807	SDCCAG3	1	1.8	1.73	0.0881
164153	UBL4B	1	1.8	1.73	0.0881
2882	GPX7	1	2.3	1.73	0.0881
94235	GNG8	1	1.8	1.73	0.0881
23376	UFL1	2	4	1.73	0.0881
54888	NSUN2	1	1.8	1.73	0.0881
771	CA12	1	2.4	1.73	0.0881
84154	RPF2	1	1.8	1.73	0.0881
441864	TARM1	1	2.3	1.73	0.0881
7541	ZBTB14	1	2.4	1.73	0.0881
10724	MGEA5	1	1.8	1.73	0.0881
10893	MMP24	1	1.8	1.73	0.0881
164	AP1G1	1	2.4	1.73	0.0881
HSA-MIR-4666B	HSA-MIR-4666B	1	1.8	1.73	0.0881
HSA-MIR-383	HSA-MIR-383	3	-1.6	1.73	0.0881
401027	C2ORF66	1	1.8	1.73	0.0881
6125	RPL5	1	2.4	1.73	0.0881
1477	CSTF1	1	1.8	1.73	0.0881
3069	HDLBP	1	3.5	1.73	0.0881
HSA-MIR-1246	HSA-MIR-1246	1	1.8	1.73	0.0881
6217	RPS16	1	1.8	1.73	0.0881
22885	ABLIM3	1	2.4	1.73	0.0881
2886	GRB7	1	1.8	1.73	0.0881
574	BAGE	3	-1	1.73	0.0881
90102	PHLDB2	1	1.8	1.73	0.0881
157697	ERICH1	1	2.4	1.73	0.0881
79850	FAM57A	1	2.3	1.73	0.0881
4855	NOTCH4	1	2.4	1.73	0.0881
5824	PEX19	1	1.8	1.73	0.0881
8525	DGKZ	1	1.8	1.73	0.0881
11342	RNF13	1	1.8	1.73	0.0881
83746	L3MBTL2	1	2.3	1.73	0.0881
HSA-MIR-3190	HSA-MIR-3190	3	-1.6	1.73	0.0881
158046	NXNL2	1	1.8	1.73	0.0881
10594	PRPF8	1	1.8	1.73	0.0881
HSA-MIR-3191	HSA-MIR-3191	3	-1.6	1.73	0.0881
83982	IFI27L2	1	2.4	1.73	0.0881
81832	NETO1	1	2.4	1.73	0.0881
643802	LOC643802	3	1.7	1.73	0.0881
84302	TMEM246	2	2.2	1.73	0.0881
54491	FAM105A	1	3.5	1.73	0.0881
51205	ACP6	1	2.4	1.73	0.0881
92935	MARS2	1	2.4	1.73	0.0881
122622	ADSSL1	1	2.4	1.73	0.0881
55770	EXOC2	1	2.4	1.73	0.0881
84305	WIBG	1	2.4	1.72	0.0901
32	ACACB	2	1.3	1.72	0.0901
6581	SLC22A3	1	2.4	1.72	0.0901
22871	NLGN1	2	-1	1.72	0.0901
HSA-MIR-4681	HSA-MIR-4681	1	2.4	1.72	0.0901
HSA-MIR-4295	HSA-MIR-4295	2	4	1.72	0.0901
HSA-MIR-5583-1	HSA-MIR-5583-1	2	-1	1.72	0.0901
HSA-MIR-5583-2	HSA-MIR-5583-2	2	-1	1.72	0.0901
81545	FBXO38	2	3	1.72	0.0901
387885	CCDC42B	1	2.4	1.72	0.0901
9415	FADS2	2	4	1.72	0.0901
22884	WDR37	1	1.8	1.72	0.0901
2352	FOLR3	1	2.4	1.72	0.0901
9970	NR1I3	2	2	1.72	0.0901
2184	FAH	1	2.4	1.71	0.0929
7862	BRPF1	1	2.4	1.71	0.0929
79812	MMRN2	1	2.4	1.71	0.0929
55668	GPATCH2L	2	-1.4	1.71	0.0929
56063	TMEM234	1	2.4	1.71	0.0929
10598	AHSA1	2	1	1.71	0.0929
1193	CLIC2	1	2.4	1.71	0.0929
79834	PEAK1	1	2.4	1.71	0.0929
388015	RTL1	2	-1.5	1.71	0.0929
7919	DDX39B	1	2.4	1.71	0.0929
8028	MLLT10	1	2.4	1.71	0.0929
283209	PGM2L1	2	-1.5	1.71	0.0929
57670	KIAA1549	1	2.4	1.71	0.0929
286499	FAM133A	1	2.4	1.71	0.0929
43849	KLK12	1	2.4	1.71	0.0929
29089	UBE2T	2	-0.9	1.71	0.0929
91523	PCED1B	1	2.4	1.71	0.0929
80270	HSD3B7	3	-1.5	1.71	0.0929
144811	LACC1	1	2.4	1.71	0.0929
54732	TMED9	1	2.4	1.71	0.0929
HSA-MIR-543	HSA-MIR-543	1	3.4	1.71	0.0929
140823	ROMO1	2	1	1.71	0.0929
HSA-MIR-885	HSA-MIR-885	1	2.4	1.71	0.0929
25980	AAR2	1	2.4	1.71	0.0929
9644	SH3PXD2A	1	2.4	1.71	0.0929
10562	OLFM4	1	2.4	1.71	0.0929
2319	FLOT2	1	3.4	1.7	0.0939
2275	FHL3	1	-1.3	1.7	0.0939
7268	TTC4	1	3.4	1.7	0.0939
579	NKX3-2	1	-1.3	1.7	0.0939
5721	PSME2	1	-1.3	1.7	0.0939
5058	PAK1	1	-1.3	1.7	0.0939
5478	PPIA	1	-1.3	1.7	0.0939
201780	SLC10A4	1	-1.3	1.7	0.0939
157855	KCNU1	2	1.9	1.7	0.0939
HSA-MIR-6770-3	HSA-MIR-6770-3	1	-1.3	1.7	0.0939
83639	TEX101	1	-1.3	1.7	0.0939
3442	IFNA5	1	1.7	1.7	0.0939
29086	BABAM1	1	3.4	1.7	0.0939
6092	ROBO2	1	-1.3	1.7	0.0939
HSA-MIR-3617	HSA-MIR-3617	1	-1.3	1.7	0.0939
162972	ZNF550	2	3.9	1.7	0.0939
352954	GATS	1	-1.3	1.7	0.0939
55293	UEVLD	1	-1.3	1.7	0.0939
8398	PLA2G6	1	-1.3	1.7	0.0939
HSA-MIR-3913-2	HSA-MIR-3913-2	1	1.7	1.7	0.0939
2853	GPR31	1	-1.3	1.7	0.0939
7784	ZP3	1	-1.3	1.7	0.0939
114825	PWWP2A	1	-1.3	1.7	0.0939
10848	PPP1R13L	1	-1.3	1.7	0.0939
83657	DYNLRB2	1	-1.3	1.7	0.0939
5511	PPP1R8	1	-1.3	1.7	0.0939
85025	TMEM60	1	-1.3	1.7	0.0939
22826	DNAJC8	1	-1.3	1.7	0.0939
23507	LRRC8B	1	2.4	1.7	0.0939
10260	DENND4A	1	3.4	1.7	0.0939
390275	OR8A1	1	3.4	1.7	0.0939
HSA-MIR-3913-1	HSA-MIR-3913-1	1	1.7	1.7	0.0939
119692	OR51S1	1	-1.3	1.7	0.0939
116173	CMTM5	1	3.4	1.7	0.0939
126364	LRRC25	1	-1.3	1.7	0.0939
54165	DCUN1D1	1	-1.3	1.7	0.0939
HSA-MIR-711	HSA-MIR-711	1	-1.3	1.7	0.0939
8675	STX16	1	-1.3	1.7	0.0939
119391	GSTO2	1	-1.3	1.7	0.0939
5653	KLK6	1	-1.3	1.7	0.0939
87769	GGACT	1	-1.3	1.7	0.0939
4240	MFGE8	1	-1.3	1.7	0.0939
51014	TMED7	1	-1.3	1.7	0.0939
64853	AIDA	1	-1.3	1.7	0.0939
HSA-MIR-6868	HSA-MIR-6868	3	4.2	1.7	0.0939
79646	PANK3	1	-1.3	1.7	0.0939
79989	TTC26	1	-1.3	1.7	0.0939
118471	PRAP1	1	1.8	1.7	0.0939
85451	UNK	1	3.4	1.7	0.0939
1361	CPB2	1	-1.3	1.7	0.0939
8187	ZNF239	1	-1.3	1.7	0.0939
343930	MSGN1	1	2.4	1.7	0.0939
337968	KRTAP6-3	1	-1.3	1.7	0.0939
59283	CACNG8	1	-1.3	1.7	0.0939
7184	HSP90B1	1	-1.3	1.7	0.0939
8761	PABPC4	1	-1.3	1.7	0.0939
10585	POMT1	1	-1.3	1.7	0.0939
2020-03-10	2020-03-10	2	2.2	1.69	0.0949
27202	C5AR2	1	2.4	1.69	0.0949
23658	LSM5	1	2.4	1.69	0.0949
285051	C2ORF61	1	3.4	1.69	0.0949
7639	ZNF85	1	1.7	1.69	0.0949
57336	ZNF287	1	1.7	1.69	0.0949
80271	ITPKC	2	2.4	1.69	0.0949
8507	ENC1	2	-1.5	1.69	0.0949
139231	FAM199X	2	0.9	1.69	0.0949
1291	COL6A1	2	0.9	1.69	0.0949
54858	PGPEP1	1	1.7	1.69	0.0949
9615	GDA	1	2.4	1.69	0.0949
85015	USP45	2	-1.5	1.69	0.0949
347736	NME9	1	3.4	1.69	0.0949
100128496	C20ORF78	2	4	1.69	0.0949
4084	MXD1	1	1.7	1.69	0.0949
8816	DCAF5	1	3.4	1.69	0.0949
91057	CCDC34	1	1.7	1.68	0.0995
1594	CYP27B1	1	2.4	1.68	0.0995
55540	IL17RB	1	1.7	1.68	0.0995
5966	REL	1	2.4	1.68	0.0995
C1ORF227	C1ORF227	1	1.7	1.68	0.0995
HSA-MIR-548AD	HSA-MIR-548AD	2	-1.2	1.68	0.0995
2736	GLI2	1	1.7	1.68	0.0995
9294	S1PR2	1	1.7	1.68	0.0995
7466	WFS1	1	1.7	1.68	0.0995
7142	TNP2	2	1.6	1.68	0.0995
64849	SLC13A3	1	2.4	1.68	0.0995
441521	CT45A5	1	1.7	1.68	0.0995
3344	FOXN2	1	1.7	1.68	0.0995
1508	CTSB	2	-1.2	1.68	0.0995
30819	KCNIP2	1	1.7	1.68	0.0995
90507	SCRN2	1	1.7	1.68	0.0995
402569	KPNA7	1	1.7	1.68	0.0995
84693	MCEE	1	1.7	1.68	0.0995
3098	HK1	1	1.7	1.68	0.0995
9013	TAF1C	1	1.7	1.68	0.0995
153129	SLC38A9	2	4	1.68	0.0995
57210	SLC45A4	1	1.7	1.68	0.0995
4323	MMP14	1	1.7	1.68	0.0995
284297	SSC5D	1	1.7	1.68	0.0995
8913	CACNA1G	1	1.7	1.68	0.0995
23040	MYT1L	1	1.7	1.68	0.0995
80213	TM2D3	1	1.7	1.68	0.0995
10549	PRDX4	1	1.7	1.68	0.0995
266722	HS6ST3	1	1.7	1.68	0.0995
79774	GRTP1	1	1.7	1.68	0.0995
64215	DNAJC1	2	-1.5	1.68	0.0995
23307	FKBP15	2	-1.2	1.68	0.0995
57689	LRRC4C	2	-1.2	1.68	0.0995
2253	FGF8	1	1.7	1.68	0.0995
55732	C1ORF112	1	3.4	1.68	0.0995
11159	RABL2A	3	1	1.68	0.0995
412	STS	1	1.7	1.68	0.0995
55432	YOD1	1	1.7	1.68	0.0995
54557	SGTB	1	2.4	1.68	0.0995
387104	SOGA3	2	3.7	1.68	0.0995
348378	FAM159A	1	1.7	1.68	0.0995
11162	NUDT6	3	-1.4	1.67	0.0998
642778	NPIPA3	3	-0.9	1.67	0.0998
9284	NPIPA1	3	-0.9	1.67	0.0998
5770	PTPN1	1	1.7	1.67	0.0998
NPIP	NPIP	3	-0.9	1.67	0.0998
23384	SPECC1L	2	1.2	1.67	0.0998
51397	COMMD10	1	2.4	1.67	0.0998
28988	DBNL	1	1.7	1.67	0.0998
LOC642778	LOC642778	3	-0.9	1.67	0.0998
3978	LIG1	1	2.4	1.67	0.0998
642799	NPIPA2	3	-0.9	1.67	0.0998
LOC642799	LOC642799	3	-0.9	1.67	0.0998
9107	MTMR6	1	1.7	1.67	0.0998
63926	ANKEF1	3	-1	1.66	0.1
91614	DEPDC7	2	-0.9	1.66	0.1
554223	LOC554223	2	-1.5	1.66	0.1
100133941	CD24	2	-0.9	1.66	0.1
9440	MED17	1	3.4	1.66	0.1
7702	ZNF143	2	-1.3	1.66	0.1
390637	GDPGP1	1	2.4	1.66	0.1
23417	MLYCD	1	3.4	1.66	0.1
124751	KRBA2	2	-0.9	1.66	0.1
84970	C1ORF94	2	-1.3	1.66	0.1
57325	CSRP2BP	2	-1.5	1.66	0.1
9425	CDYL	2	2.9	1.66	0.1
HSA-MIR-1251	HSA-MIR-1251	2	-1.5	1.66	0.1
1164	CKS2	1	1.7	1.66	0.1
23435	TARDBP	1	2.5	1.65	0.103
51020	HDDC2	1	2.5	1.65	0.103
84649	DGAT2	3	4.8	1.64	0.103
1360	CPB1	1	1.7	1.65	0.103
129080	EMID1	1	2.5	1.65	0.103
SPATA31A2	SPATA31A2	3	-1.7	1.64	0.103
79465	ULBP3	1	3.4	1.64	0.103
8856	NR1I2	2	0.9	1.65	0.103
90050	FAM181A	1	2.5	1.65	0.103
391002	PRAMEF8	1	2.5	1.65	0.103
403284	OR6C68	1	2.5	1.64	0.103
59335	PRDM12	1	2.5	1.65	0.103
9397	NMT2	1	2.5	1.65	0.103
26060	APPL1	1	2.5	1.65	0.103
10858	CYP46A1	1	2.5	1.65	0.103
HSA-MIR-941-1	HSA-MIR-941-1	1	2.4	1.65	0.103
644100	ARL14EPL	1	2.5	1.65	0.103
283238	SLC22A24	1	2.5	1.65	0.103
10695	CNPY3	1	2.5	1.65	0.103
1286	COL4A4	2	2.3	1.65	0.103
51075	TMX2	1	2.5	1.65	0.103
3716	JAK1	1	1.7	1.64	0.103
9953	HS3ST3B1	1	2.5	1.64	0.103
51440	HPCAL4	1	2.5	1.65	0.103
389073	C2ORF80	1	2.5	1.65	0.103
170371	C10ORF128	1	2.5	1.65	0.103
3078	CFHR1	2	-1.1	1.64	0.103
27242	TNFRSF21	1	2.4	1.65	0.103
51312	SLC25A37	1	2.5	1.65	0.103
64219	PJA1	2	-1.3	1.65	0.103
6568	SLC17A1	2	-1.4	1.64	0.103
283417	DPY19L2	1	2.5	1.64	0.103
83479	DDX59	1	2.5	1.65	0.103
23299	BICD2	2	3.9	1.64	0.103
HSA-MIR-4264	HSA-MIR-4264	1	1.7	1.64	0.103
8453	CUL2	1	2.5	1.65	0.103
121256	TMEM132D	1	2.5	1.64	0.103
643812	KRTAP27-1	2	3.9	1.64	0.103
79192	IRX1	1	2.5	1.64	0.103
59084	ENPP5	1	2.5	1.65	0.103
660	BMX	1	3.4	1.65	0.103
835	CASP2	1	2.5	1.65	0.103
644150	WIPF3	2	1	1.64	0.103
10904	BLCAP	1	2.5	1.65	0.103
7515	XRCC1	1	1.7	1.64	0.103
54898	ELOVL2	1	2.5	1.65	0.103
374973	TEX38	1	1.7	1.63	0.104
152559	PAQR3	1	2.5	1.62	0.104
100533952	RBAK-RBAKDN	2	0.9	1.63	0.104
124997	WDR81	2	3.9	1.63	0.104
57570	TRMT5	1	2.5	1.63	0.104
79572	ATP13A3	2	3.9	1.63	0.104
196528	ARID2	2	1.2	1.62	0.104
553	AVPR1B	1	2.5	1.63	0.104
79415	C17ORF62	1	2.5	1.63	0.104
134864	TAAR1	1	2.5	1.63	0.104
5350	PLN	1	2.5	1.63	0.104
4528	MTIF2	1	2.5	1.63	0.104
84647	PLA2G12B	1	2.5	1.63	0.104
11322	TMC6	1	1.7	1.62	0.104
55847	CISD1	2	1.6	1.62	0.104
79648	MCPH1	1	2.5	1.63	0.104
84258	SYT3	1	2.5	1.63	0.104
343702	XKR7	1	2.5	1.63	0.104
122786	FRMD6	1	1.7	1.62	0.104
23483	TGDS	1	3.4	1.63	0.104
3673	ITGA2	1	1.7	1.62	0.104
HSA-MIR-6755	HSA-MIR-6755	1	1.7	1.62	0.104
401124	DTHD1	2	3.9	1.63	0.104
22887	FOXJ3	1	2.5	1.63	0.104
1579	CYP4A11	1	2.5	1.62	0.104
10466	COG5	1	2.5	1.63	0.104
56344	CABP5	1	3.4	1.63	0.104
152137	CCDC50	1	1.7	1.63	0.104
153241	CEP120	1	2.5	1.63	0.104
7764	ZNF217	1	2.5	1.63	0.104
25836	NIPBL	1	2.5	1.63	0.104
85458	DIXDC1	1	1.7	1.62	0.104
26993	AKAP8L	1	1.6	1.61	0.105
197258	FUK	2	3.9	1.61	0.105
147807	ZNF524	1	1.6	1.6	0.105
51442	VGLL1	2	-1.5	1.61	0.105
2957	GTF2A1	2	-1.5	1.6	0.105
HSA-MIR-106B	HSA-MIR-106B	1	1.6	1.6	0.105
9790	BMS1	1	2.5	1.61	0.105
100129583	FAM47E	2	-1.5	1.61	0.105
83723	FAM57B	2	2.4	1.61	0.105
155051	CRYGN	2	-1.5	1.61	0.105
79053	ALG8	1	1.6	1.6	0.105
30968	STOML2	1	3.4	1.61	0.105
54840	APTX	2	-1.5	1.61	0.105
HSA-MIR-1537	HSA-MIR-1537	1	1.6	1.6	0.105
27151	CPAMD8	1	1.6	1.6	0.105
81931	ZNF93	1	2.5	1.61	0.105
1874	E2F4	1	1.6	1.6	0.105
91582	RPS19BP1	1	2.5	1.6	0.105
2255	FGF10	1	-1.3	1.6	0.105
3608	ILF2	2	-1.5	1.61	0.105
84260	TCHP	1	1.6	1.6	0.105
57699	CPNE5	1	1.6	1.6	0.105
83983	TSSK6	1	1.6	1.6	0.105
4835	NQO2	2	-1.5	1.61	0.105
55238	SLC38A7	2	-1.4	1.61	0.105
88745	RRP36	2	-1.5	1.61	0.105
10529	NEBL	1	2.5	1.6	0.105
221400	TDRD6	2	-1.5	1.61	0.105
54836	BSPRY	1	1.6	1.59	0.107
115098	CCDC124	1	1.6	1.59	0.107
HSA-MIR-4692	HSA-MIR-4692	2	1.8	1.59	0.107
3820	KLRB1	3	2.6	1.59	0.107
84072	HORMAD1	1	1.6	1.59	0.107
HSA-MIR-613	HSA-MIR-613	1	1.6	1.59	0.107
HSA-MIR-4444-2	HSA-MIR-4444-2	1	1.6	1.59	0.107
219333	USP12	1	1.6	1.59	0.107
496	ATP4B	1	1.6	1.59	0.107
9758	FRMPD4	1	3.3	1.59	0.107
57571	CARNS1	1	1.6	1.59	0.107
64105	CENPK	1	1.6	1.59	0.107
29997	GLTSCR2	1	1.6	1.59	0.107
22904	SBNO2	2	3.8	1.59	0.107
HSA-MIR-4444-1	HSA-MIR-4444-1	1	1.6	1.59	0.107
23093	TTLL5	1	1.6	1.59	0.107
2787	GNG5	1	1.6	1.59	0.107
84734	FAM167B	1	1.6	1.59	0.107
3384	ICAM2	3	4.9	1.59	0.107
85290	KRTAP4-3	1	1.6	1.59	0.107
54861	SNRK	1	1.6	1.59	0.107
56123	PCDHB13	1	1.6	1.59	0.107
ATPBD4	ATPBD4	1	1.6	1.59	0.107
84107	ZIC4	1	1.6	1.59	0.107
57002	YAE1D1	1	1.6	1.59	0.107
6664	SOX11	1	1.6	1.59	0.107
81706	PPP1R14C	1	1.6	1.59	0.107
8438	RAD54L	1	1.6	1.59	0.107
10121	ACTR1A	3	1.3	1.59	0.107
23587	ELP5	1	1.6	1.59	0.107
84905	ZNF341	1	1.6	1.59	0.107
11185	INMT	1	1.6	1.59	0.107
51192	CKLF	1	1.6	1.59	0.107
84264	HAGHL	1	1.6	1.59	0.107
283987	HID1	1	1.6	1.59	0.107
343406	OR10R2	1	1.6	1.59	0.107
HSA-MIR-506	HSA-MIR-506	3	-0.7	1.59	0.107
7499	XG	1	1.6	1.59	0.107
157680	VPS13B	1	1.6	1.59	0.107
114548	NLRP3	1	1.6	1.59	0.107
100861437	NARR	1	1.6	1.59	0.107
154091	SLC2A12	2	1.5	1.59	0.107
441161	OOEP	1	1.6	1.59	0.107
HSA-MIR-517B	HSA-MIR-517B	3	-0.9	1.59	0.107
54879	ST7L	1	1.6	1.59	0.107
6588	SLN	3	-1.1	1.58	0.108
11112	HIBADH	1	3.3	1.58	0.108
26659	OR7A5	1	2.5	1.58	0.108
340069	FAM170A	1	2.5	1.58	0.108
58497	PRUNE	1	2.5	1.58	0.108
100505724	KRTAP9-7	1	1.6	1.58	0.108
5062	PAK2	2	-1.4	1.58	0.108
4773	NFATC2	1	1.6	1.58	0.108
401335	C7ORF65	1	2.5	1.58	0.108
23043	TNIK	1	2.5	1.58	0.108
83667	SESN2	1	2.5	1.58	0.108
55621	TRMT1	2	-1.4	1.58	0.108
441933	OR13G1	2	3.9	1.58	0.108
346389	MACC1	2	2.1	1.58	0.108
22818	COPZ1	1	1.6	1.58	0.108
347735	SERINC2	1	2.5	1.58	0.108
4100	MAGEA1	1	1.6	1.58	0.108
5714	PSMD8	1	3.3	1.58	0.108
5155	PDGFB	1	2.5	1.58	0.108
4018	LPA	2	-1.4	1.58	0.108
388677	NOTCH2NL	1	2.5	1.58	0.108
29102	DROSHA	1	2.5	1.58	0.108
5565	PRKAB2	1	1.6	1.58	0.108
51479	ANKFY1	2	1.2	1.58	0.108
84450	ZNF512	1	2.5	1.58	0.108
253582	TMEM244	1	2.5	1.58	0.108
57211	GPR126	1	1.6	1.58	0.108
1027	CDKN1B	1	1.6	1.58	0.108
729396	GAGE12J	3	-0.9	1.57	0.109
55839	CENPN	2	-1.2	1.57	0.109
80336	PABPC1L	3	-1.7	1.57	0.109
627	BDNF	3	-0.9	1.57	0.109
HSA-MIR-3978	HSA-MIR-3978	3	-0.9	1.57	0.109
HSA-MIR-650	HSA-MIR-650	1	3.3	1.57	0.109
114876	OSBPL1A	1	1.6	1.57	0.109
133522	PPARGC1B	2	2.3	1.57	0.109
64949	MRPS26	1	2.6	1.57	0.109
339403	RXFP4	3	-1.7	1.57	0.109
8359	HIST1H4A	2	-0.9	1.57	0.109
55748	CNDP2	2	-0.9	1.57	0.109
10871	CD300C	1	2.6	1.57	0.109
158830	CXORF65	3	-0.7	1.57	0.109
2794	GNL1	1	1.6	1.56	0.11
56892	C8ORF4	1	3.3	1.56	0.11
89932	PAPLN	1	1.6	1.56	0.11
HSA-MIR-5683	HSA-MIR-5683	3	-1.4	1.56	0.11
284615	ANKRD34A	1	3.3	1.56	0.11
2114	ETS2	1	1.6	1.56	0.11
7432	VIP	1	2.6	1.56	0.11
HSA-MIR-938	HSA-MIR-938	1	2.6	1.56	0.11
51366	UBR5	1	2.6	1.56	0.11
54510	PCDH18	1	2.6	1.56	0.11
114131	UCN3	1	2.6	1.56	0.11
[truncated: 12,072 more rows]
